# Supplementary material for: Pore-wall functionalization of covalent organic framework palladium catalysts boosts the multicomponent reaction of CO 2
Source: Royal Society of Chemistry journal article supplement (doi:10.1039/d5qm00708a), 2025-11-18
Supplement: d5qm00708a1.pdf [file d5qm00708a1.pdf]

## Supporting Information

### Pore-Wall Functionalization of Covalent Organic Framework Palladium Catalysts Boosts the Multicomponent Reaction of CO<sub>2</sub>

Shiyuan Wei,<sup>1</sup> Benling Yu,<sup>1</sup> Jiawei Li,<sup>\*1</sup> Jianhui Zhu,<sup>1</sup> You Wang,<sup>1</sup> Yaqi Li,<sup>1</sup> Jianhan Huang,<sup>\*1</sup> You-Nian Liu<sup>1</sup>

<sup>1</sup> College of Chemistry and Chemical Engineering, Hunan Provincial Key Laboratory of Micro and Nano Material Interface Science, Central South University, Changsha 410083, Hunan (P. R. China)

E-mail: lijawei@csu.edu.cn; jianhanhuang@csu.edu.cn

## **1. Experimental Procedures**

### **General Materials and Measurements**

All of the reagents were commercially available and were used without further purification. Powder X-ray diffraction (PXRD) patterns were collected on an Advance D8 equipped with Ni-filtered Cu K radiation (40 kV, 100 mA) at room temperature with a scan speed of  $10^{\circ}\cdot\text{min}^{-1}$ .  $^1\text{H}$  NMR and  $^{13}\text{C}$  NMR spectra were done on a Bruker Model AM-400 (400 MHz) spectrometer. Infrared (IR) spectra were measured from a KBr pellets on Nicolet iN10 MX microscopic infrared spectrometer (Thermo Scientific Co., USA) in the range of 4000 to  $400\text{ cm}^{-1}$  under ambient condition. The content of metal ions was determined by the inductively coupled plasma mass spectrometry (ICP-MS). The pore structure of the materials was measured by  $\text{N}_2$  adsorption-desorption isotherms at 77 K with Micromeritics ASAP 2460 surface area. The  $S_{\text{BET}}$  of the polymers was calculated using the BET model in the ranging of  $P/P_0 = 0.05 - 0.30$ , the total pore volume (V-total) of the materials was calculated from the isotherms at  $P/P_0 = 0.99$ , the pore size distribution (PSD), micropore area (S-micro), and V-micro were all calculated by the non-local density functional theory (NLDFT) method. The X-ray photoelectron spectroscopy (XPS) experiments were conducted using Thermo ESCALAB spectrometer with an Al K- $\alpha$  source. Scanning electron microscopy (SEM) measurements were performed on a JSM-7610FPlus microscope at an acceleration voltage of 10 kV.

**Synthesis of COF-TA <sup>1</sup>:** Typically, a mixture of 1,3,5-Tris(4-aminophenyl)benzene (TAPB) (0.08 mmol, 28.12 mg), terephthalaldehyde (DFB) (0.12 mmol, 16.1 mg), O-DCB (0.5 mL) and n-Butanol (0.5 mL) were added to a 5 mL ampoule and sonicated for 30 min. Then, 6 M HOAc (0.1 ml) was added and sonicated for 5 min. The ampoule containing the mixture was frozen in liquid nitrogen, and after three cycles of freezing-extraction-thawing, the reaction was heated at 120 °C for 72 h. After the reaction was completed, the sample bottle was taken out, cooled to room temperature, transferred to a centrifuge tube, and washed with methanol and THF for 3 times, and then dispersed the solids in 15 mL of saturated NH<sub>4</sub>HCO<sub>3</sub>, sonicated until uniformly dispersed. The solid was separated after stirring for 4 h. 5 mL of isopropanol was added, and after separation and vacuum drying at 100 °C for 12 h, COF-TA was obtained with a yield of 89%.

**Synthesis of COF-TA-4F <sup>2</sup>:** Typically, a mixture of 1,3,5-Tris(4-aminophenyl)benzene (28.12 mg, 0.08 mmol), 2,3,5,6-Tetrafluoroterephthalaldehyde (24.73 mg, 0.12 mmol), 1,4-dioxane (1.6 mL) and mesitylene (0.4 mL) were added to a 5 mL ampoule and sonicated for 30 min. Then, 6 M HOAc (0.2 ml) was added and sonicated for 5 min. The ampoule containing the mixture was frozen in liquid nitrogen, and after three cycles of freezing-extraction-thawing, the reaction was heated at 120 °C for 72 h. The solid was collected by centrifugation, washed three times with MeOH, THF and CH<sub>2</sub>Cl<sub>2</sub>, extracted by Soxhlet extraction for one day, and dried overnight under vacuum. Orange powder was obtained in a yield of 85%.

**Synthesis of COF-TA-OCH<sub>3</sub> <sup>2</sup>:** Typically, a mixture of 1,3,5-Tris(4-

aminophenyl)benzene (28.12 mg, 0.08 mmol), 2,5-dimethoxybenzaldehyde (23.31 mg, 0.12 mmol), 1,4-dioxane (1.6 mL) and mesitylene (0.4 mL) were added to a 5 mL ampoule and sonicated for 30 min. Then, 6 M HOAc (0.2 ml) was added and sonicated for 5 min. The ampoule containing the mixture was frozen in liquid nitrogen, and after three cycles of freezing-extraction-thawing, the reaction was heated at 120 °C for 72 h. The solid was collected by centrifugation, washed three times with MeOH, THF and CH<sub>2</sub>Cl<sub>2</sub>, extracted by Soxhlet extraction for one day, and dried overnight under vacuum. Yellow powder was obtained in a yield of 86%.

**Synthesis of COF-TA-OHex<sup>3</sup>:** Typically, a mixture of 1,3,5-Tris(4-aminophenyl)benzene (28.12 mg, 0.08 mmol), 2,5-Bis(hexyloxy)terephthalaldehyde (40.13 mg, 0.12 mmol), 1,4-dioxane (1.6 mL) and mesitylene (0.4 mL) were added to a 5 mL ampoule and sonicated for 30 min. Then, 6 M HOAc (0.2 ml) was added and sonicated for 5 min. The ampoule containing the mixture was frozen in liquid nitrogen, and after three cycles of freezing-extraction-thawing, the reaction was heated at 120 °C for 72 h. The solid was collected by centrifugation, washed three times with MeOH, THF and CH<sub>2</sub>Cl<sub>2</sub>, extracted by Soxhlet extraction for one day, and dried overnight under vacuum. Yellow powder was obtained in a yield of 89%.

**Synthesis of Pd@ TA:** The activated COF-TA (30 mg) was dispersed into acetonitrile (4 mL) and sonicated for 30 min. Then Pd(OAc)<sub>2</sub> (10 mg) was added. The mixture was heated at 50 °C for 12 h. The resulting precipitate was collected by centrifugation and washed with acetonitrile four times. The dried solid was dispersed into acetone (2 mL) and NaBH<sub>4</sub> solution (2 mL, 4 mg/mL) was added quickly under an ice-water bath, and

the reaction was carried out for 12 h. At the end of the reaction, grey-green powder was obtained, and the solid was washed thoroughly with acetone and water and dried in a vacuum drying oven at 80 °C overnight.

**Synthesis of Pd@TA-4F, Pd@TA-OCH<sub>3</sub> and Pd@TA-OHex:** As a comparison, Pd@TA-4F, Pd@TA-OCH<sub>3</sub> and Pd@TA-OHex were also synthesized using the same procedure except for the replacement of COF-TA by COF-TA-4F, COF-TA-OCH<sub>3</sub> or COF-TA-OHex, respectively.

**Synthesis of poly(N-vinyl-2-pyrrolidone) (PVP) stabilized Pd NPs.**

In a round bottle, aqueous Na<sub>2</sub>PdCl<sub>4</sub> solution ( $1.0 \times 10^{-4}$  mol·cm<sup>-3</sup>) was added to a preheated (90 °C) aqueous mixture (30 cm<sup>3</sup>) containing ascorbic acid ( $8.5 \times 10^{-4}$  mol) and PVP ( $5.0 \times 10^{-3}$  mol; PVP/Pd molar ratio=10). The mixture was kept under stirring at 90 °C for 3 h, and a solution of Pd NPs was obtained. The Pd NPs were cleaned up from the excess of PVP via flocculation with acetone (1/3 v/v solution/acetone), rinsed thoroughly with acetone, and redispersed in water attaining ca. 0.4 wt% Pd in the final solution.

**General procedure for the catalytic reactions:** For the cycloaddition reactions of CO<sub>2</sub>, isocyanide and 2-iodoanilines, a typical step is as follows. First, 2-iodoaniline (0.3 mmol), tert-butyl isocyanide (0.45 mmol), and 1,8-diazabicyclo[5.4.0]undec-7-ene (DBU) (0.6 mmol) were added in 2 mL of anhydrous MeCN in a 25 mL Schlenk tube. After all substrates were dissolved, the catalyst was added, and the catalytic reaction was then carried out under a CO<sub>2</sub> balloon atmosphere at 80 °C for 12 h. After removing the COF catalyst by centrifugation, the filtrate was extracted with ethyl acetate and was

then concentrated under vacuum to obtain the crude product, which was further purified by silica gel chromatography with the mixture of ethyl acetate/petroleum ether as the eluent. The yield of product was quantified by  $^1\text{H}$  NMR analyses.

#### **The Recycling experiment of Pd@TA-OCH<sub>3</sub>**

After reaction, the catalyst was firstly collected by centrifugation. Then, it was washed stepwise with  $\text{CH}_2\text{Cl}_2$  ( $3 \times 5$  ml), distilled water ( $3 \times 5$  ml) and ethanol ( $3 \times 5$  ml). At last, the catalyst was dried under vacuum at 60 °C overnight and be directly used for the next catalytic run.

## 2. Results and Discussion

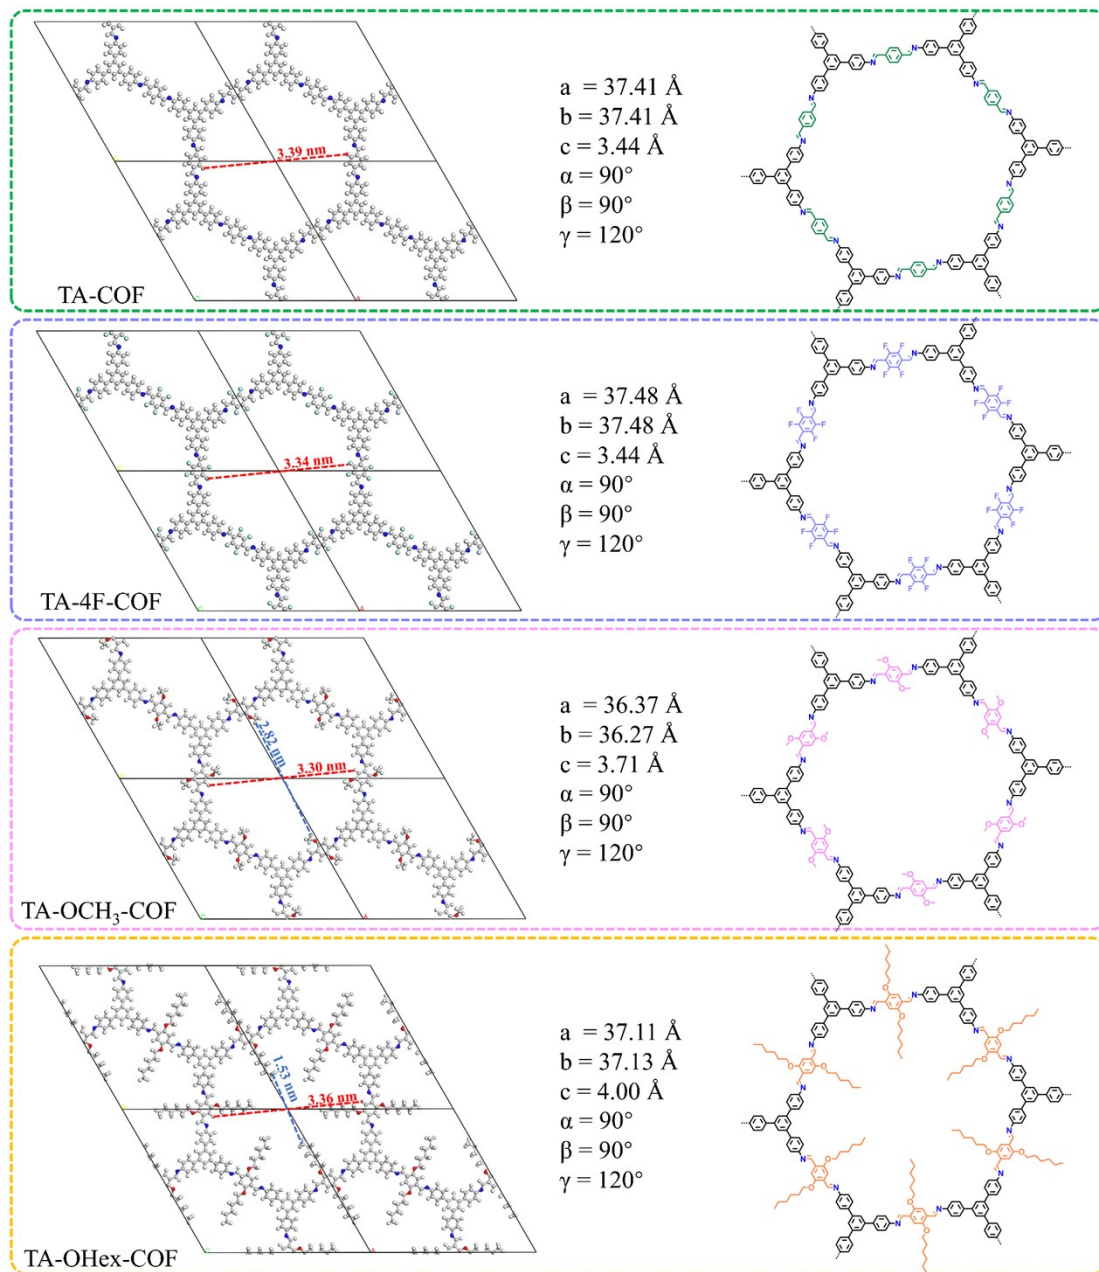

**Figure S1.** The chemical structure simulation and molecular formula illustration of COF-TA, TA-4F, TA-OCH<sub>3</sub>, TA-OHex.

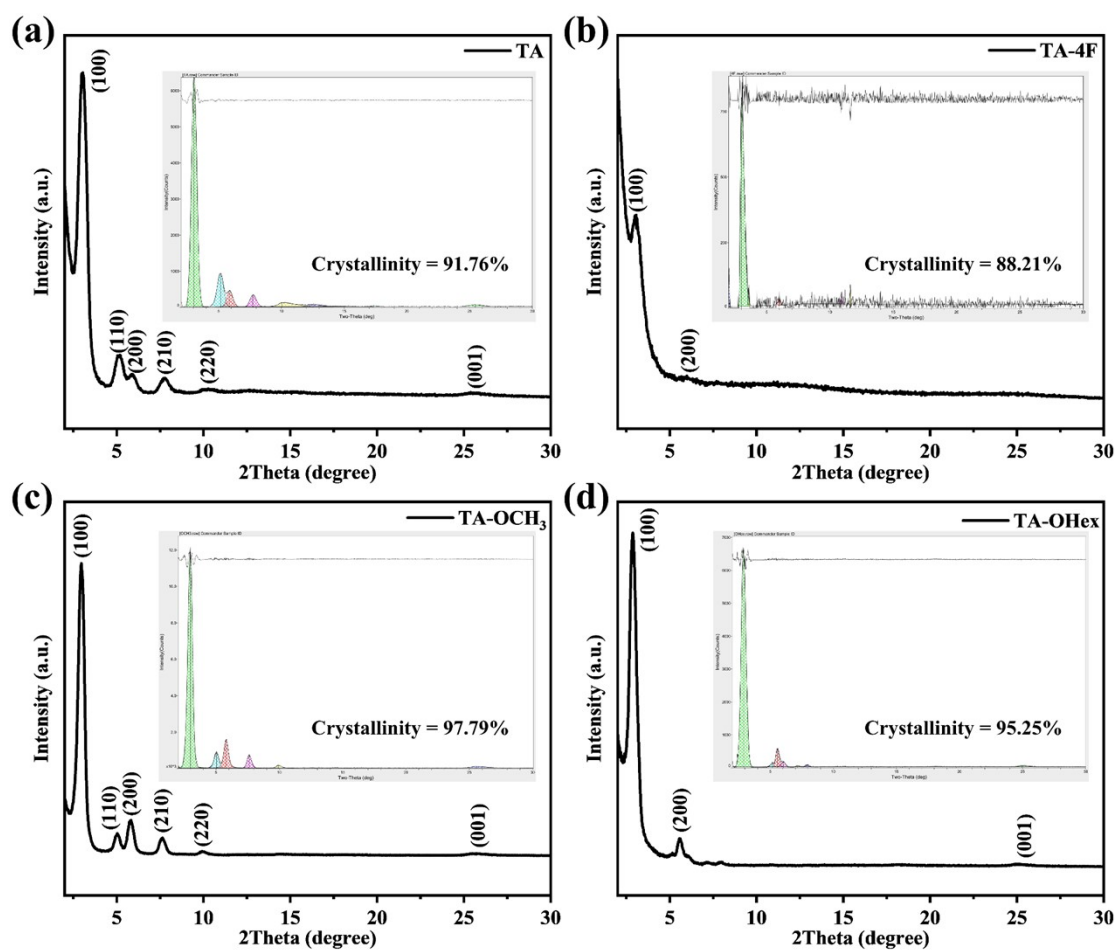

**Figure S2.** PXRD patterns and crystallinity index of (a) TA, (b) TA-4F, (c) TA-OCH<sub>3</sub>, (d) TA-OHex.

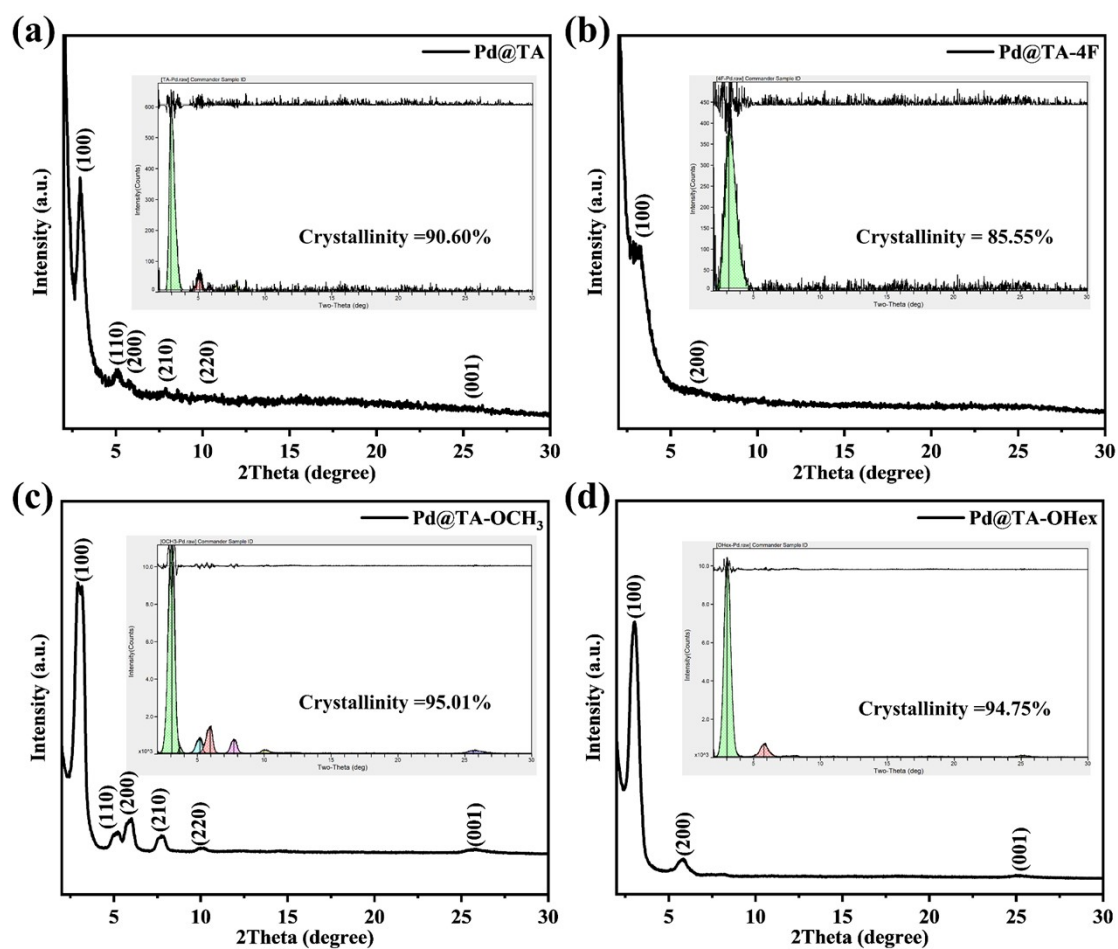

**Figure S3.** PXRD patterns and crystallinity index of (a) Pd@TA, (b) Pd@TA-4F, (c) Pd@TA-OCH<sub>3</sub>, (d) Pd@TA-OHex.

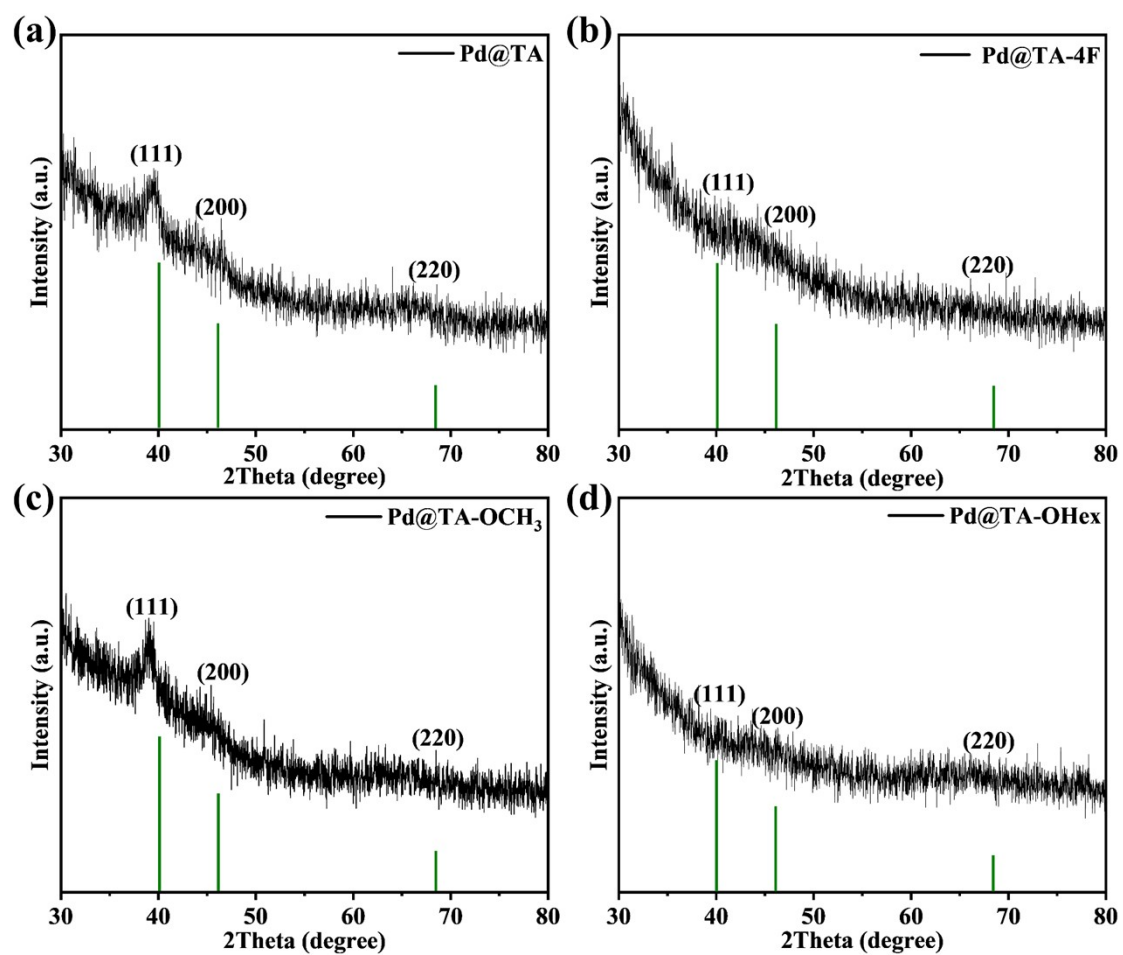

**Figure S4.** PXRD patterns of (a) Pd@TA, (b) Pd@TA-4F, (c) Pd@TA-OCH<sub>3</sub>, (d) Pd@TA-OHex.

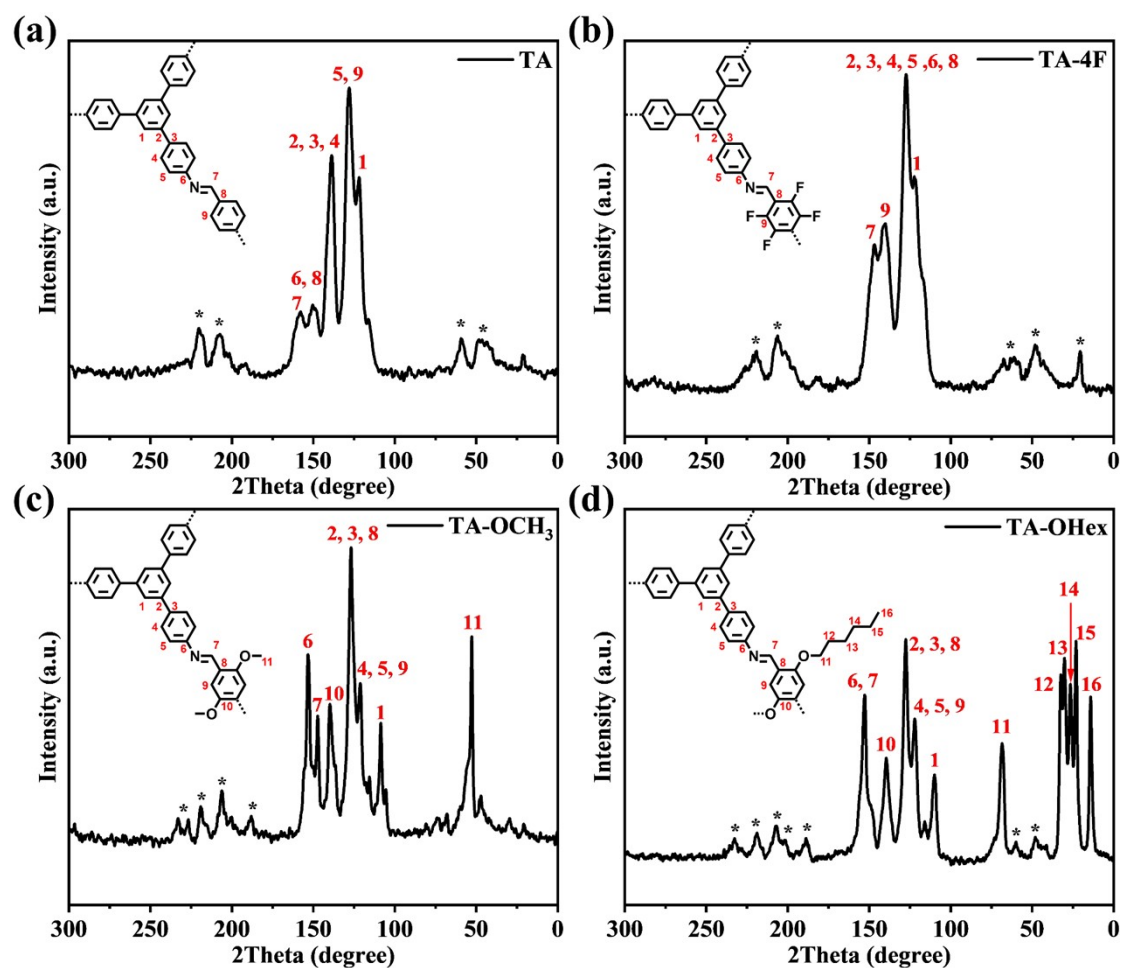

**Figure S5.**  $^{13}\text{C}$  CP-MAS NMR spectra of a) TA, b) TA-4F, c) TA-OCH<sub>3</sub> and d) TA-OHex.

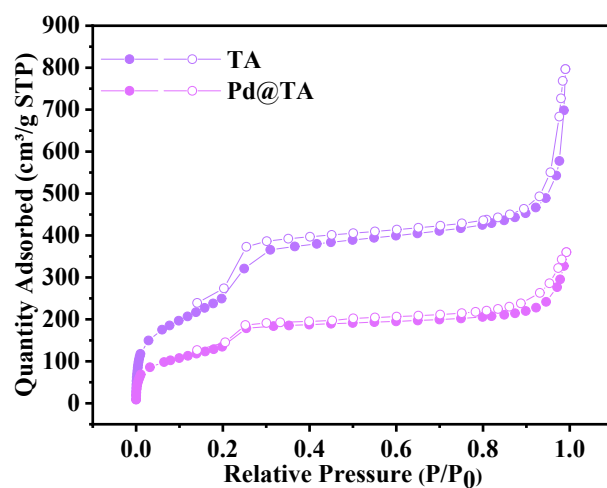

**Figure S6.** N<sub>2</sub> adsorption and desorption isotherms of COF-TA and Pd@TA at 77 K.

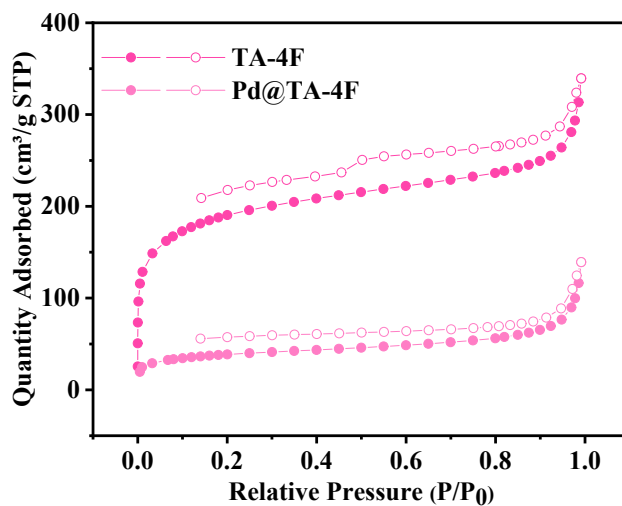

**Figure S7.** N<sub>2</sub> adsorption and desorption isotherms of COF-TA-4F and Pd@TA-4F at 77 K.

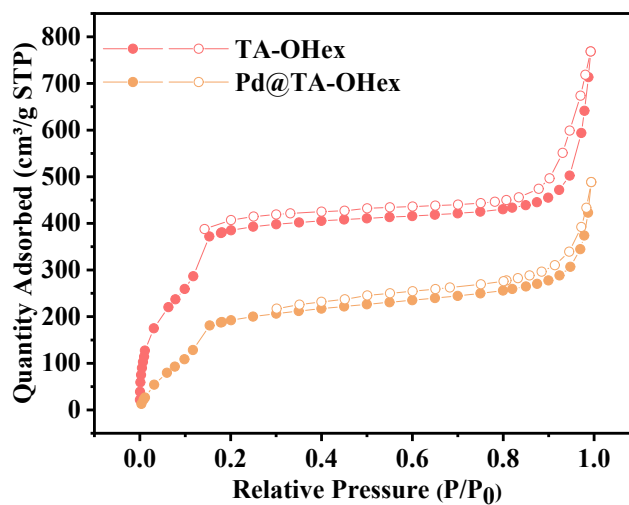

**Figure S8.** N<sub>2</sub> adsorption and desorption isotherms of COF-TA-OHex and Pd@TA-OHex at 77 K.

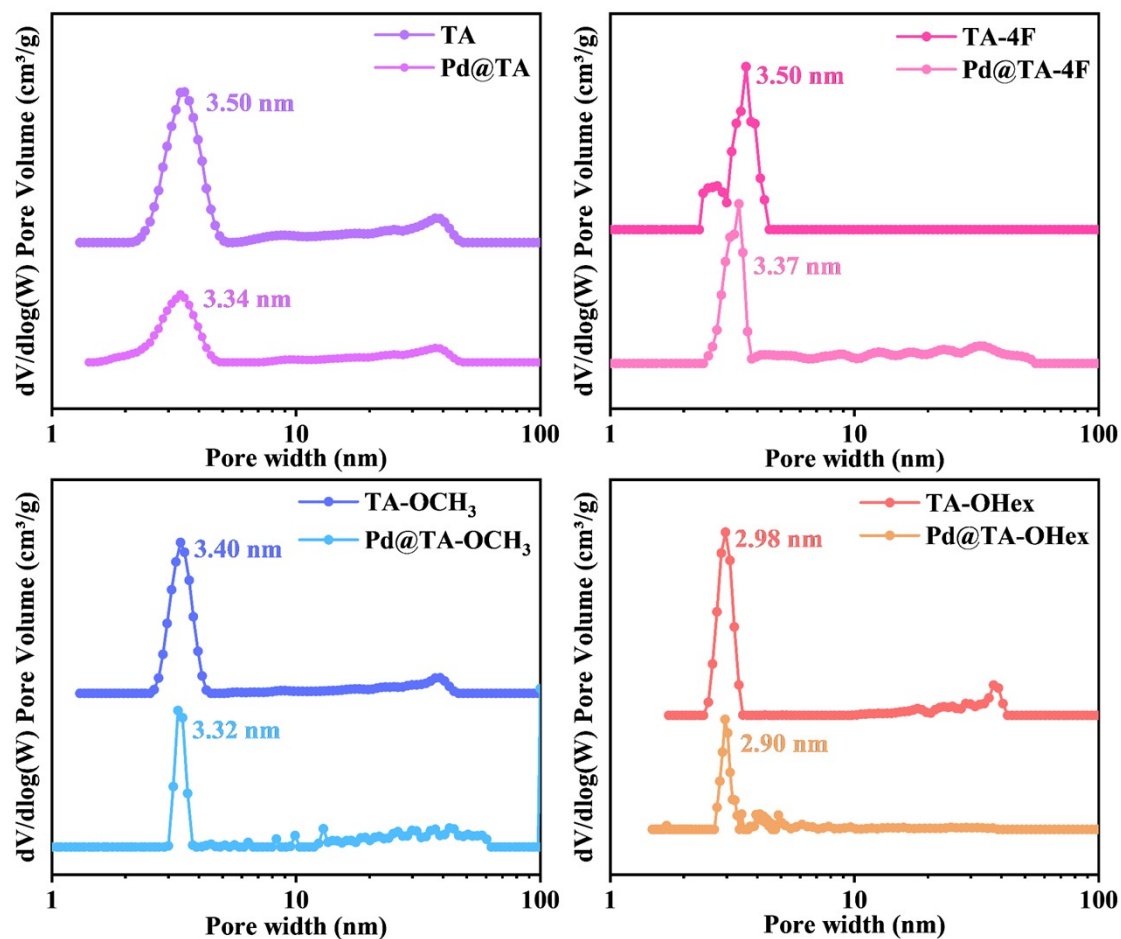

**Figure S9.** Pore size distribution.

**Table S1.** BET surface area and pore volume.

| COFs                | BET surface area (m <sup>2</sup> /g) | Pore Volume (cm <sup>3</sup> /g) | Pd@COFs                | BET surface area (m <sup>2</sup> /g) | Pore Volume (cm <sup>3</sup> /g) |
|---------------------|--------------------------------------|----------------------------------|------------------------|--------------------------------------|----------------------------------|
| TA                  | 1043                                 | 1.23                             | Pd@TA                  | 542                                  | 0.56                             |
| TA-4F               | 607                                  | 0.53                             | Pd@TA-4F               | 142                                  | 0.22                             |
| TA-OCH <sub>3</sub> | 1994                                 | 2.32                             | Pd@TA-OCH <sub>3</sub> | 1777                                 | 1.85                             |
| TA-OHex             | 1535                                 | 1.19                             | Pd@TA-OHex             | 1103                                 | 0.76                             |

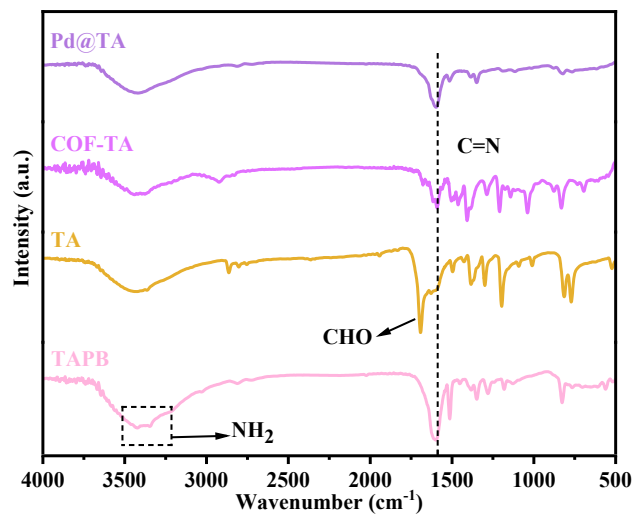

**Figure S10.** FT-IR spectra of TAPB, TA, COF-TA and Pd@TA.

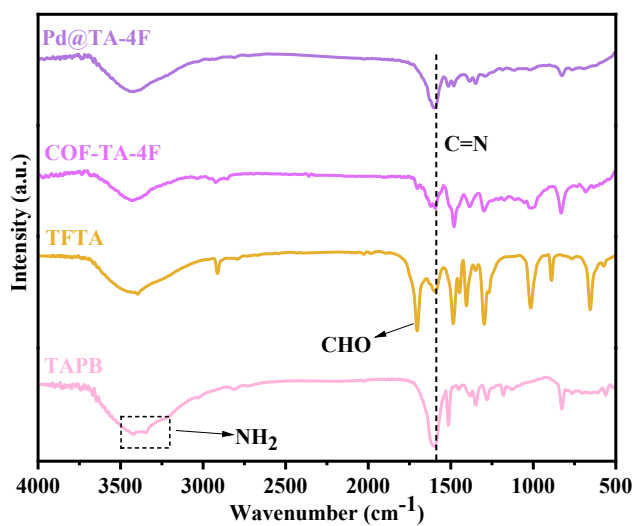

**Figure S11.** FT-IR spectra of TAPB, TA, COF-TA-4F and Pd@TA-4F.

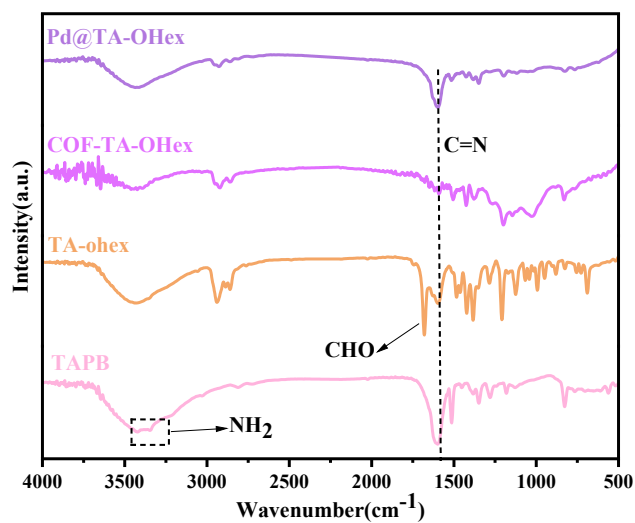

**Figure S12.** FT-IR spectra of TAPB, TA, COF-TA-OHex and Pd@TA-OHex.

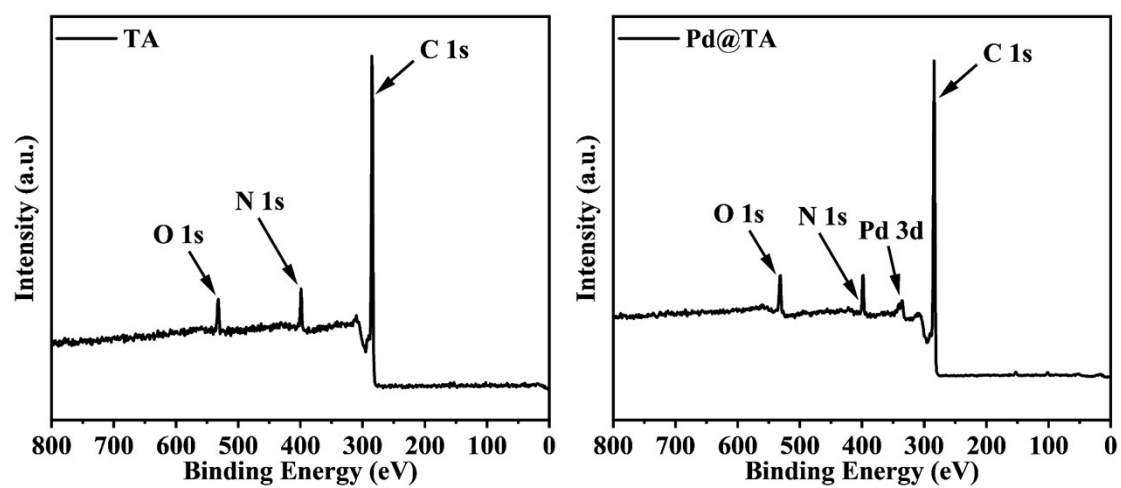

Figure S13. XPS survey of COF-TA and Pd@TA.

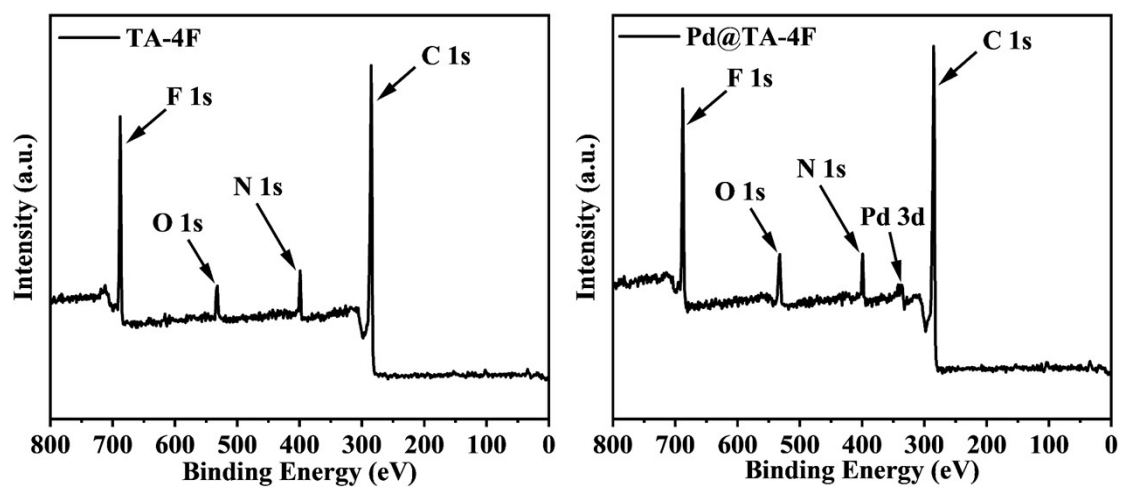

Figure S14. XPS survey of COF-TA-4F and Pd@TA-4F.

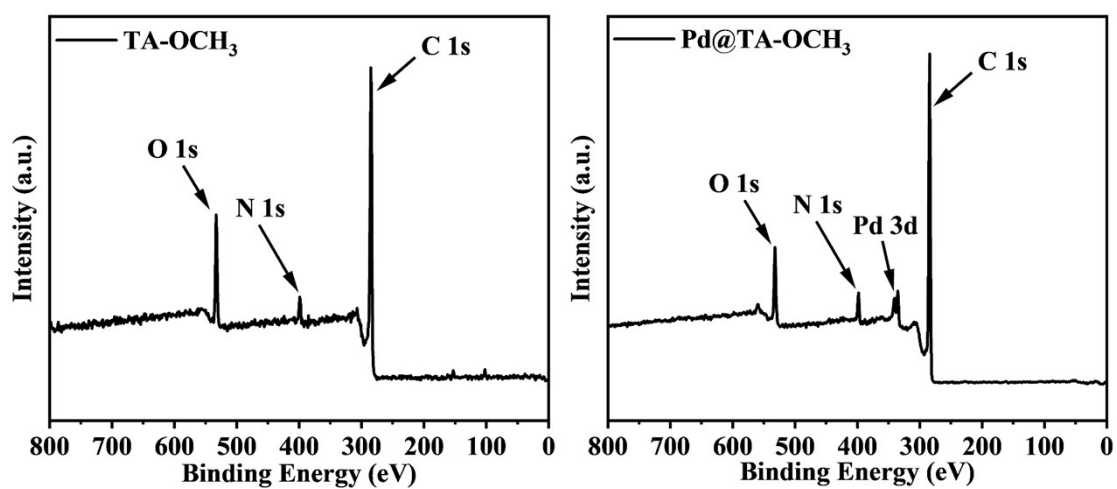

Figure S15. XPS survey of COF-TA-OCH<sub>3</sub> and Pd@TA-OCH<sub>3</sub>.

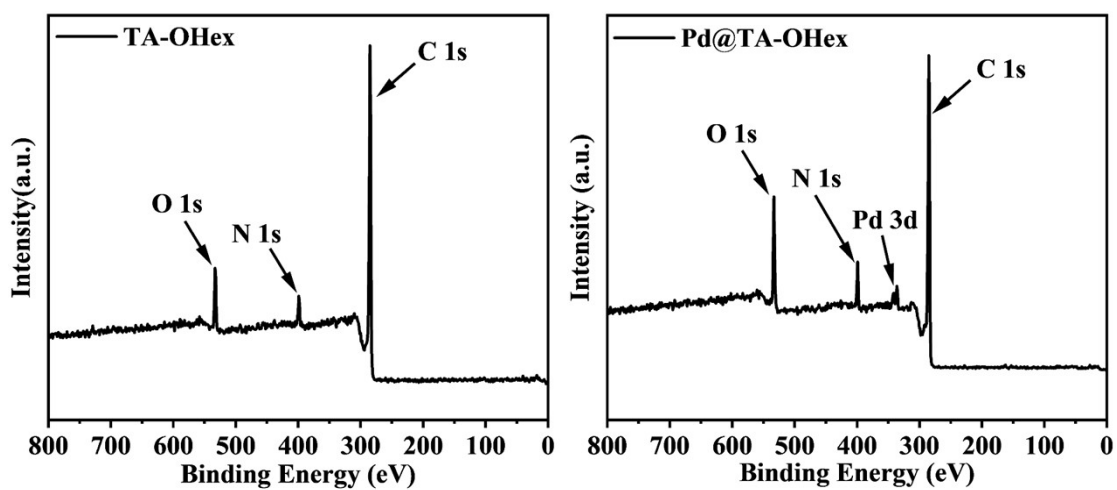

Figure S16. XPS survey of COF-TA-OHex and Pd@TA-OHex.

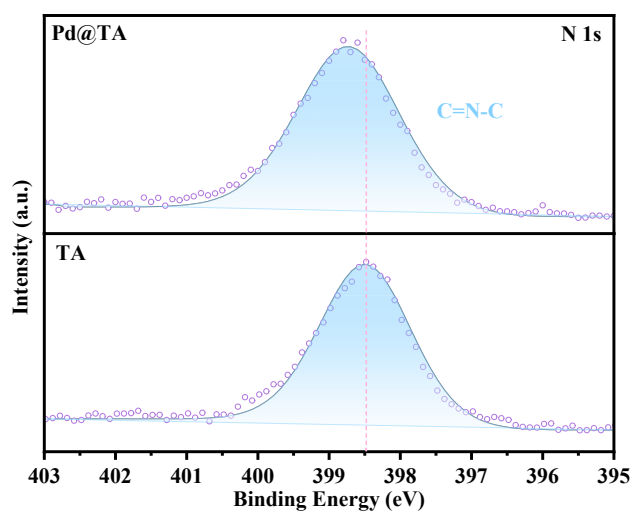

**Figure S17.** XPS spectra in N 1s region of COF-TA and Pd@TA.

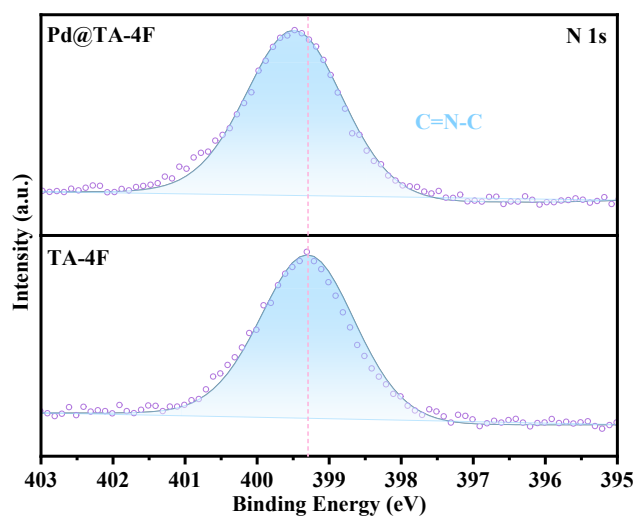

**Figure S18.** XPS spectra in N 1s region of COF-TA-4F and Pd@TA-4F.

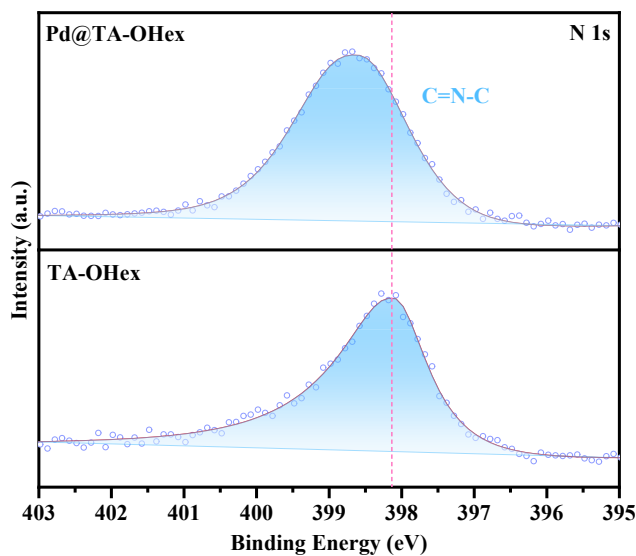

**Figure S19.** XPS spectra in N 1s region of COF-TA-OHex and Pd@TA-OHex.

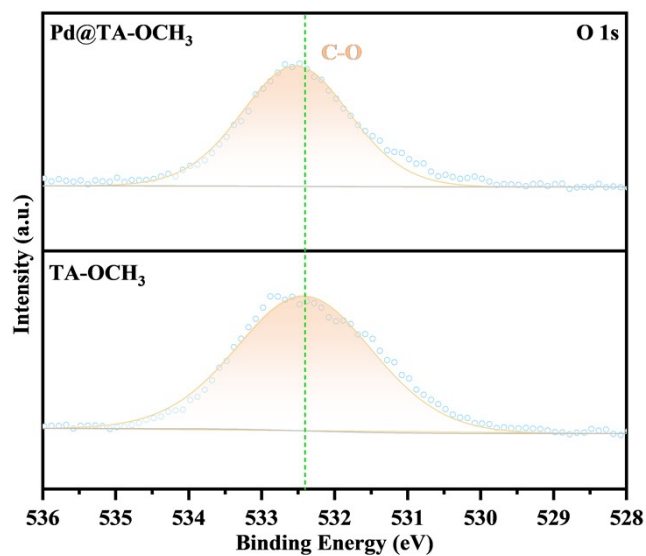

**Figure S20.** XPS spectra in N 1s region of COF-TA-OCH<sub>3</sub> and Pd@TA-OCH<sub>3</sub>.

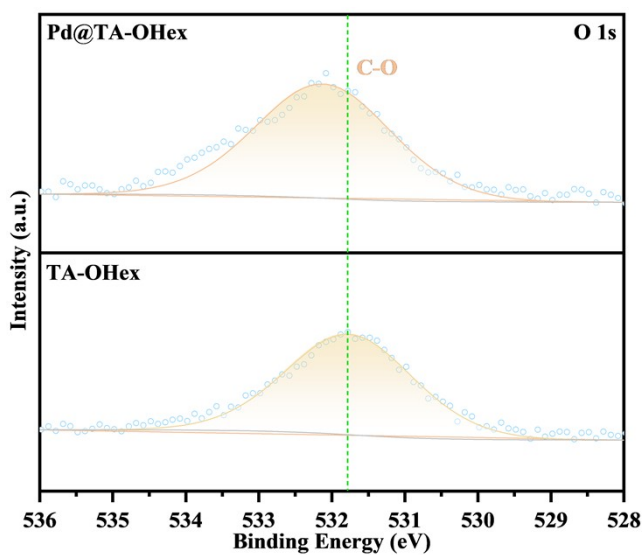

**Figure S21.** XPS spectra in N 1s region of COF-TA-OHex and Pd@TA-OHex.

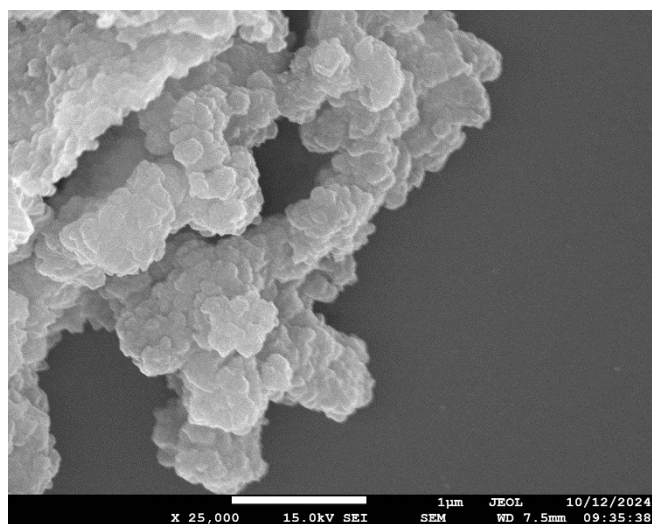

**Figure S22.** SEM image of COF-TA.

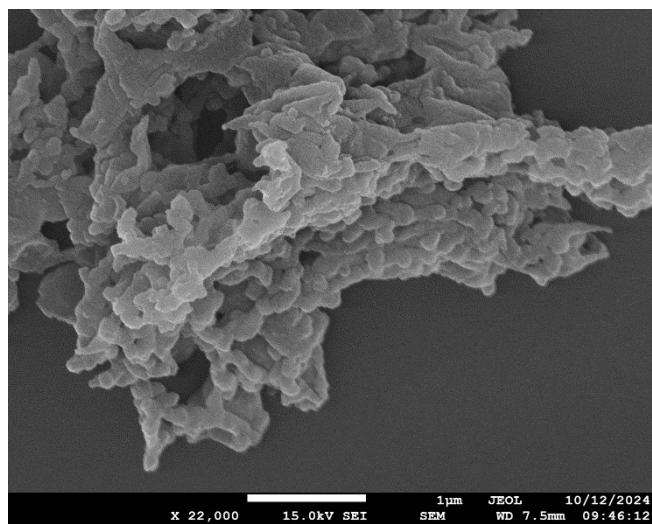

**Figure S23.** SEM image of COF-TA-4F.

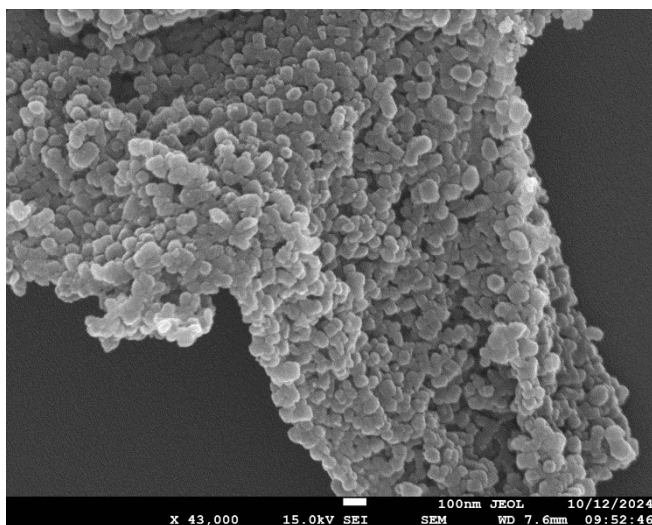

**Figure S24.** SEM image of COF-TA-OCH<sub>3</sub>.

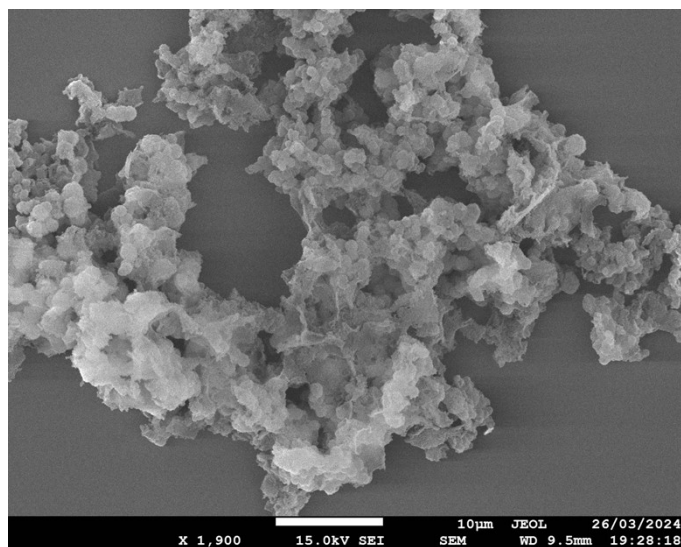

**Figure S25.** SEM image of COF-TA-OHex

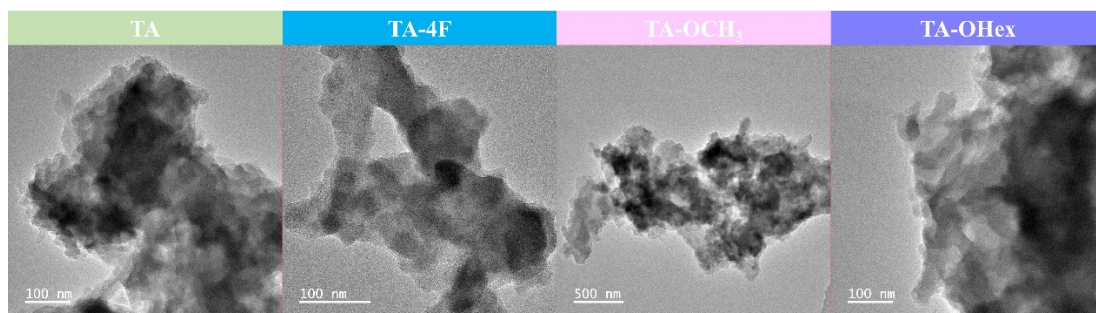

**Figure S26.** TEM images of COF-TA, TA-4F, TA-OCH<sub>3</sub> and TA-OHex.

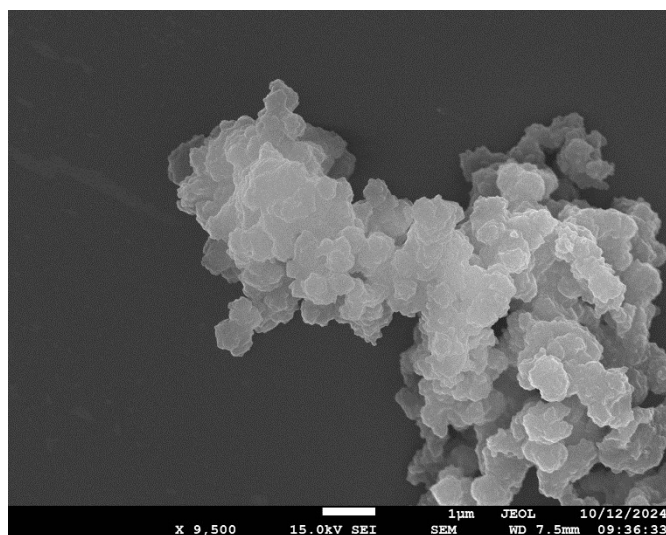

**Figure S27.** SEM image of Pd@TA

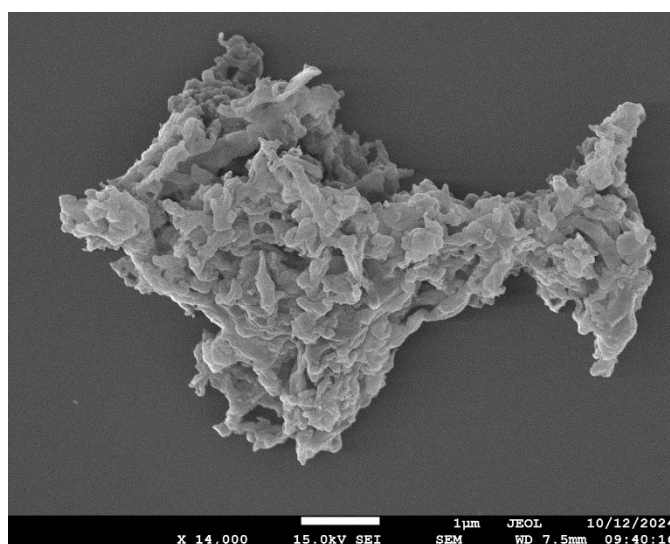

**Figure S28.** SEM image of Pd@TA-4F

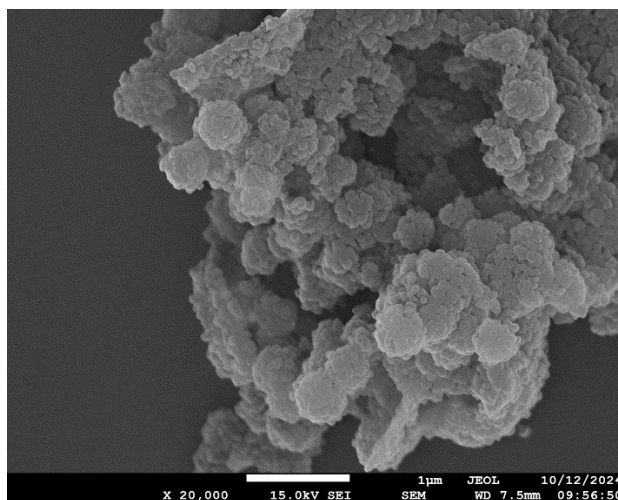

**Figure S29.** SEM image of Pd@TA-OCH<sub>3</sub>.

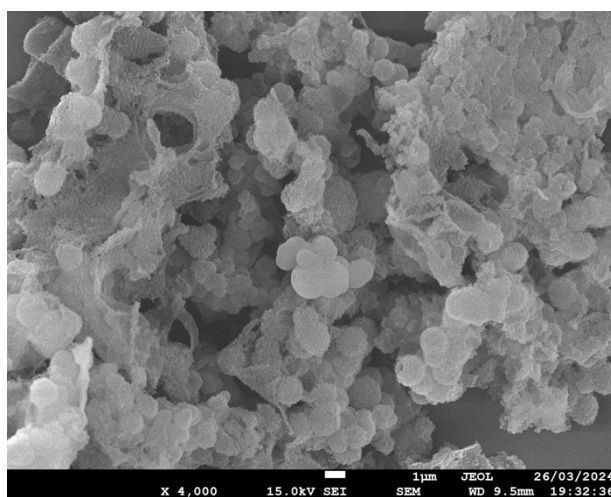

**Figure S30.** SEM image of Pd@TA-OHex.

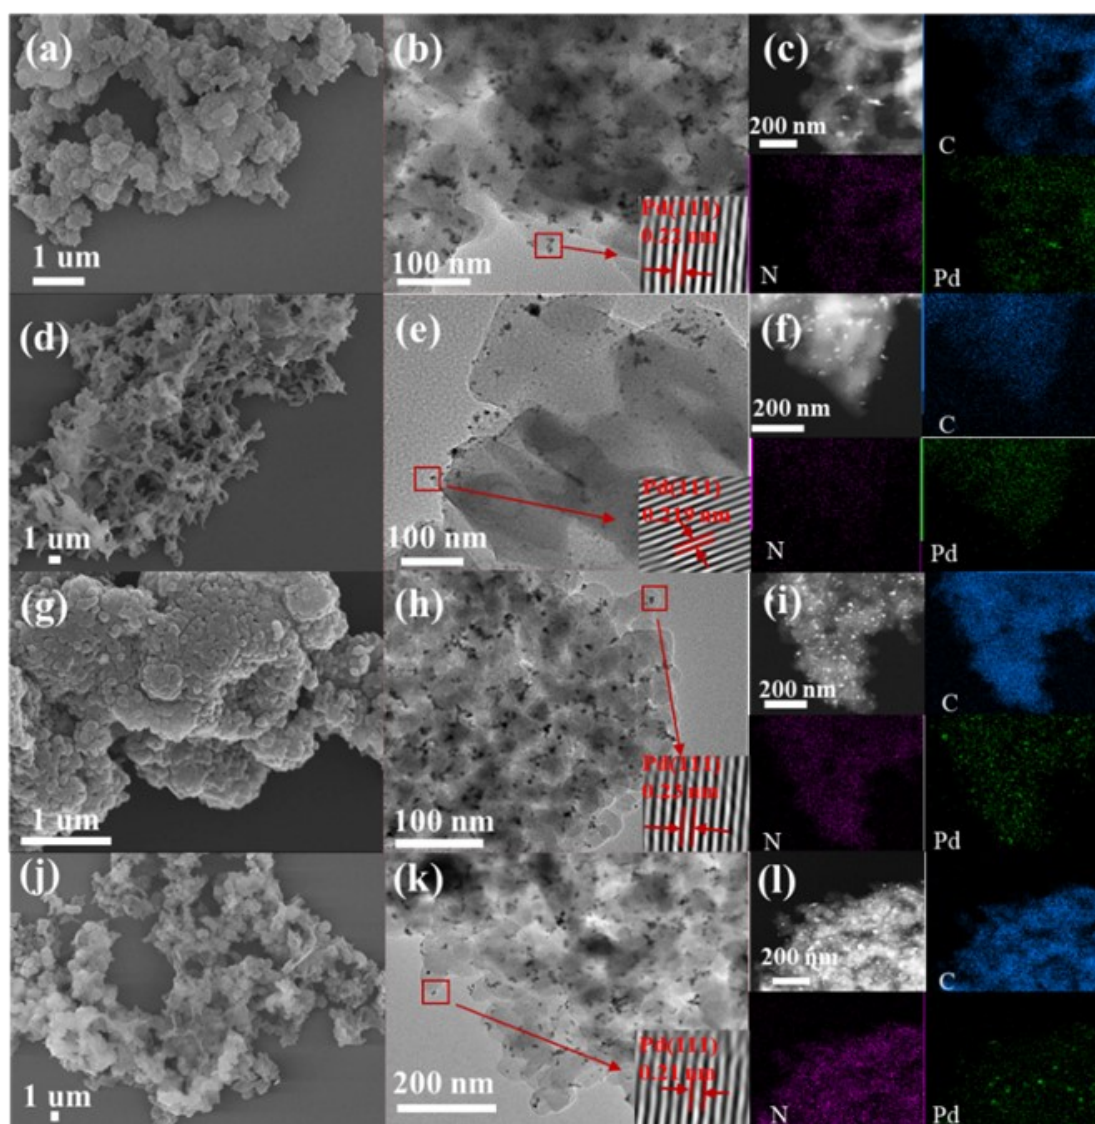

**Figure S31.** Scanning electron microscopy images of (a) Pd@TA; (d) Pd@TA-4F; (g) Pd@TA-OCH<sub>3</sub>; (j) Pd@TA-OHex; transmission electron microscopy images and high-resolution images of palladium nanoparticles (b) Pd@TA; (e) Pd@TA-4F; (h) Pd@TA-OCH<sub>3</sub>; (k) Pd@TA-OHex; EDS spectra (c) Pd@TA; (f) Pd@TA-4F; (i) Pd@TA-OCH<sub>3</sub>; (l) Pd@TA-OHex.

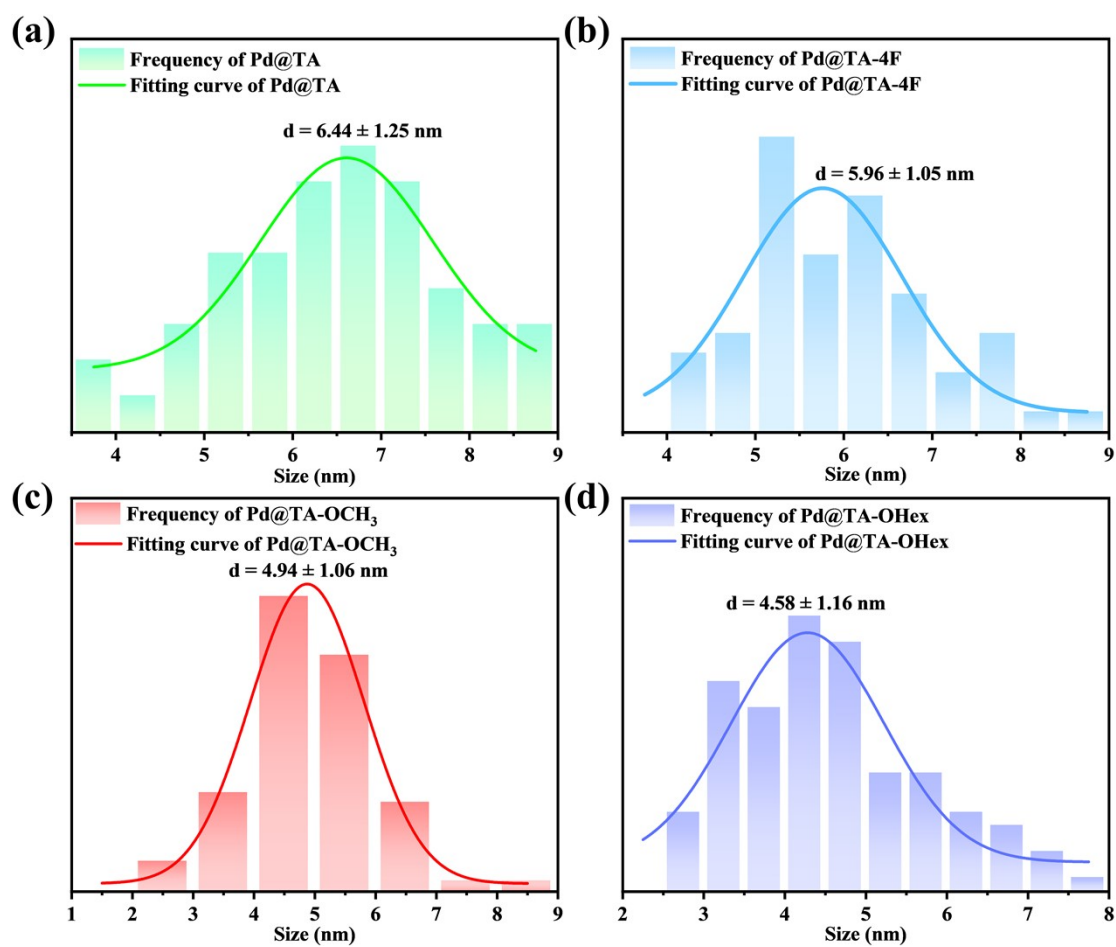

**Figure S32.** The particle size distribution of Pd NPs

**Table S2.** Optimization of catalytic conditions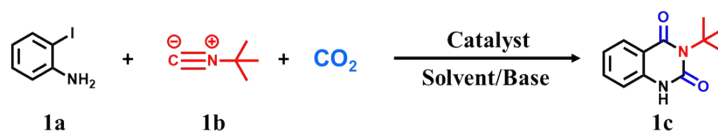

| Entry | Variation from the standard conditions <sup>a</sup>                | Yield/%  |
|-------|--------------------------------------------------------------------|----------|
| 1     | None                                                               | 98       |
| 2     | 9 h/18 h                                                           | 90/99    |
| 3     | 60 °C                                                              | 81       |
| 4     | CS <sub>2</sub> CO <sub>3</sub> instead of DBU                     | 78       |
| 5     | DMSO/DMF/1,4-dioxane instead of MeCN                               | 88/54/75 |
| 6     | Pd@TA instead of Pd@TA-OCH <sub>3</sub>                            | 64       |
| 7     | Pd@TA-4F instead of Pd@TA-OCH <sub>3</sub>                         | 55       |
| 8     | Pd@TA-OHex instead of Pd@TA-OCH <sub>3</sub>                       | 70       |
| 9     | Pd@Pd(OAc) <sub>2</sub> instead of Pd@TA-OCH <sub>3</sub>          | 82       |
| 10    | A physical mixture of Pd(OAc) <sub>2</sub> and TA-OCH <sub>3</sub> | 27       |
| 11    | TA-OCH <sub>3</sub> instead of Pd@TA-OCH <sub>3</sub>              | trace    |
| 12    | Pd NPs instead of Pd@TA-OCH <sub>3</sub>                           | 41       |
| 13    | A physical mixture of Pd NPs and TA-OCH <sub>3</sub>               | 34       |

<sup>a</sup>Standard condition: 2-iodoaniline (0.3 mmol), tert-butyl isocyanide (0.45 mmol), and 1,8-diazabicyclo[5.4.0]undec-7-ene (DBU) (0.6 mmol), Pd@TA-OCH<sub>3</sub> (5 mg), MeCN (2 mL), CO<sub>2</sub> balloon, 80 °C, 12 h.

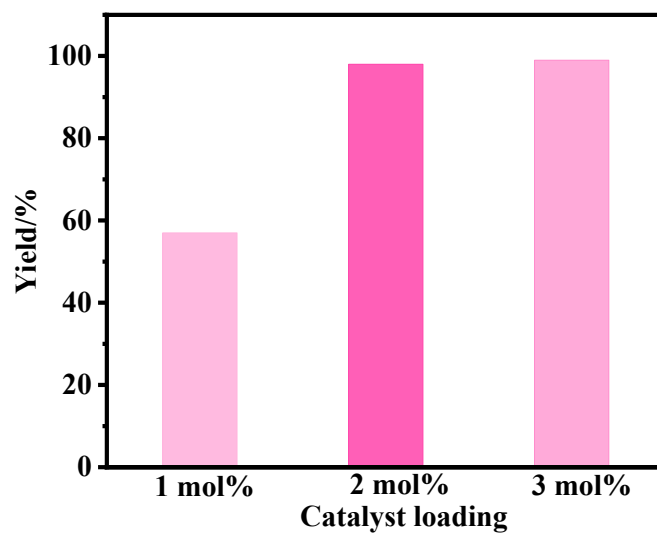

**Figure S33.** Effect of the catalyst loading on yield.

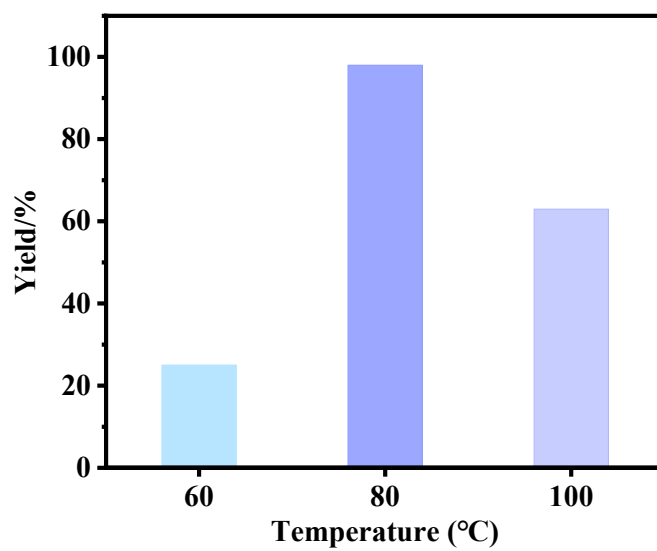

**Figure S34.** Effect of the reaction temperature on yield.

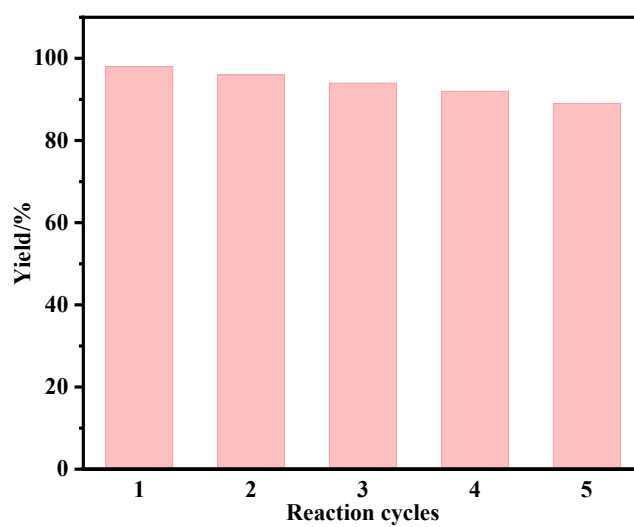

**Figure S35.** Cyclic performance test.

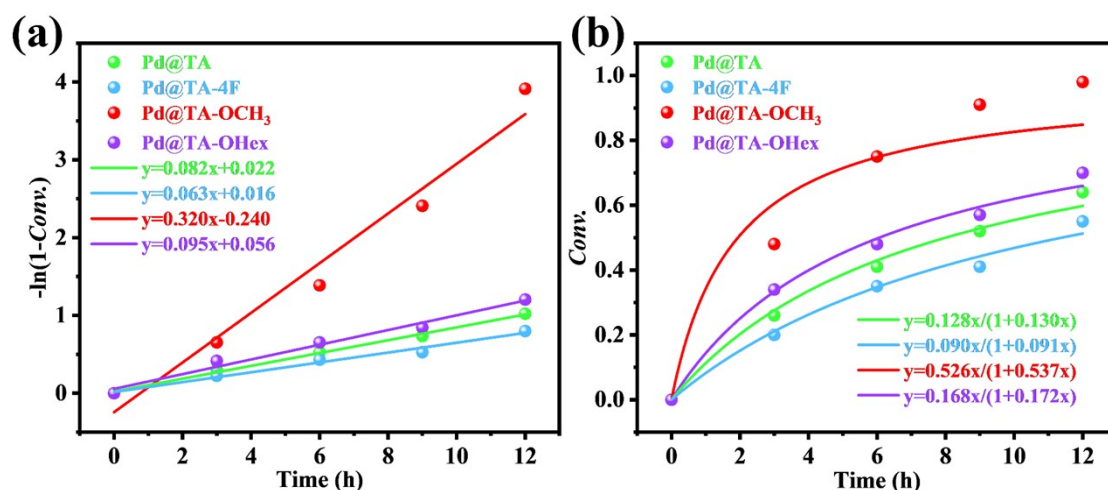

**Figure S36.** (a) First-order and (b) Second-order kinetics study of the reaction.

**Table S3.** Kinetic fitting parameters.

| First-order kinetics   | Equation              | Rate Constant (k)      | Correlation Coefficient (R <sup>2</sup> ) | Average value |
|------------------------|-----------------------|------------------------|-------------------------------------------|---------------|
| Pd@TA                  | $y=0.082x+0.022$      | $0.063 \text{ h}^{-1}$ | 0.996                                     | 0.983         |
| Pd@TA-4F               | $y=0.063x+0.016$      | $0.082 \text{ h}^{-1}$ | 0.983                                     |               |
| Pd@TA-OCH <sub>3</sub> | $y=0.320x-0.240$      | $0.320 \text{ h}^{-1}$ | 0.968                                     |               |
| Pd@TA-OHex             | $y=0.095x+0.056$      | $0.095 \text{ h}^{-1}$ | 0.985                                     |               |
| Second-order kinetics  | Equation              | Rate Constant (k)      | Correlation Coefficient (R <sup>2</sup> ) | Average value |
| Pd@TA                  | $y=0.128x/(1+0.130x)$ | $0.133 \text{ h}^{-1}$ | 0.990                                     | 0.975         |
| Pd@TA-4F               | $y=0.090x/(1+0.091x)$ | $0.093 \text{ h}^{-1}$ | 0.986                                     |               |
| Pd@TA-OCH <sub>3</sub> | $y=0.526x/(1+0.537x)$ | $0.548 \text{ h}^{-1}$ | 0.933                                     |               |
| Pd@TA-OHex             | $y=0.168x/(1+0.172x)$ | $0.175 \text{ h}^{-1}$ | 0.991                                     |               |

#### First-order kinetic equation:

$$-\ln(1 - Conv.) = k_1 t \quad (1)$$

Among them,  $Conv.$  refers to the reaction conversion rate. NMR analysis revealed that there is only the main product, with other by-products being negligible. Therefore, the yield is used to represent the conversion rate.  $k_1$  is the reaction rate constant, and  $t$  is the reaction time.

#### Second-order kinetic equation:

$$Conv. = \frac{k_2 Conv._e^2 t}{1 + k_2 Conv._e} \quad (2)$$

Among them,  $Conv.$  refers to the reaction conversion rate.  $Conv._e$  denotes the equilibrium conversion rate. As shown in Table S2, when the reaction time is 12 h, the yield reaches 98% (Entry 1). Extending the reaction time to 18 h results in almost no change in the yield (Entry 3). Therefore,  $Conv._e$  is set to 0.98 in this case.  $k_2$  is the

reaction rate constant, and  $t$  is the reaction time.

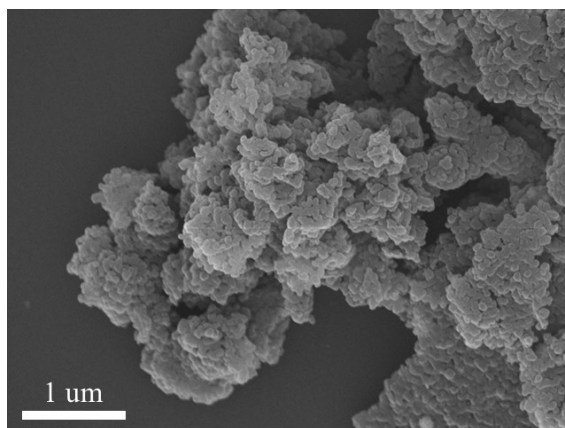

**Figure S37.** SEM image of Pd@TA-OCH<sub>3</sub> after catalysis.

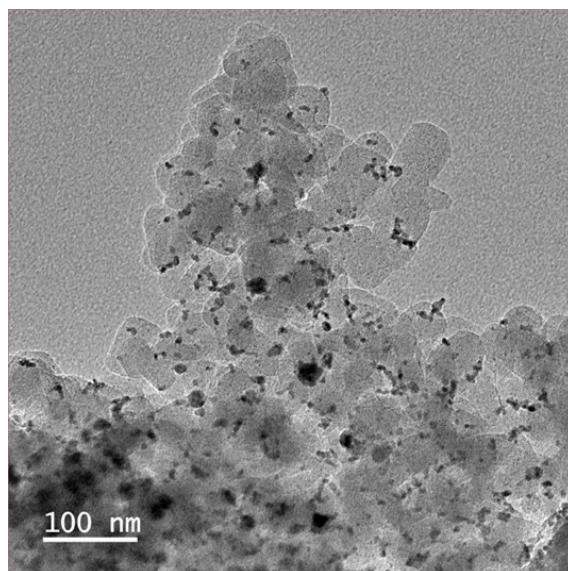

**Figure S38.** TEM image of Pd@TA-OCH<sub>3</sub> after catalysis.

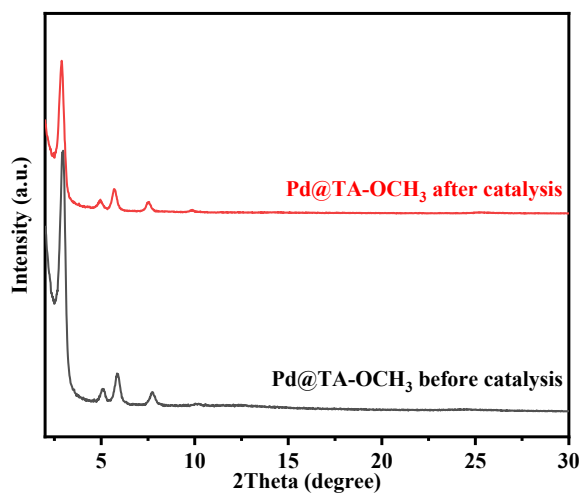

**Figure S39.** PXRD patterns of Pd@TA-OCH<sub>3</sub> after catalysis.

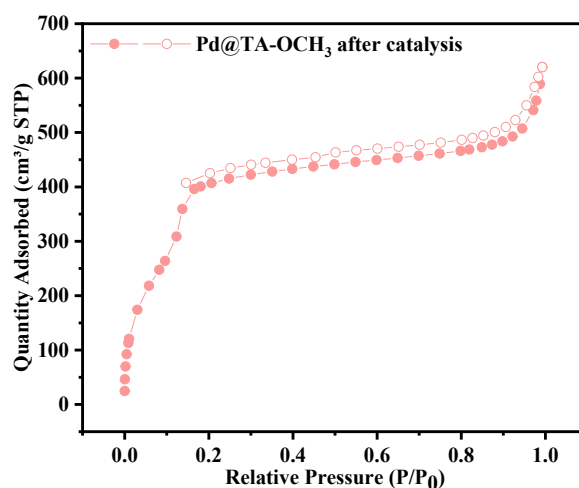

**Figure S40.** N<sub>2</sub> adsorption and desorption isotherms of Pd@TA-OCH<sub>3</sub> at 77 K after catalysis.

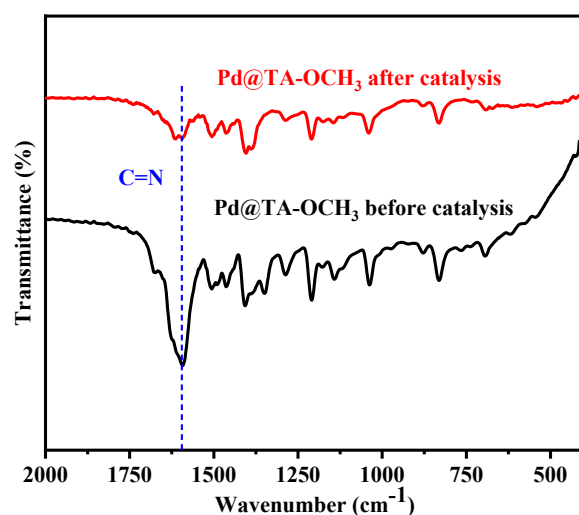

**Figure S41.** FT-IR spectra of Pd@TA-OCH<sub>3</sub> after catalysis.

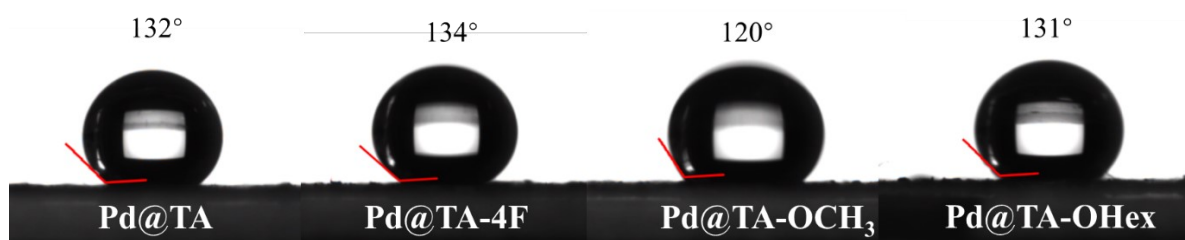

**Figure S42.** Water contact angel experiments of different COFs Pd catalysts.

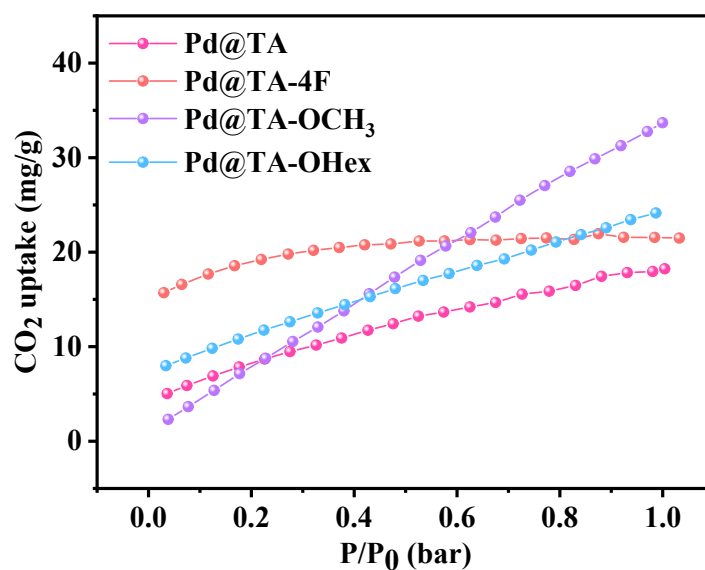

**Figure S43.** CO<sub>2</sub> adsorption isotherms for different COFs Pd catalysts at 298 K.

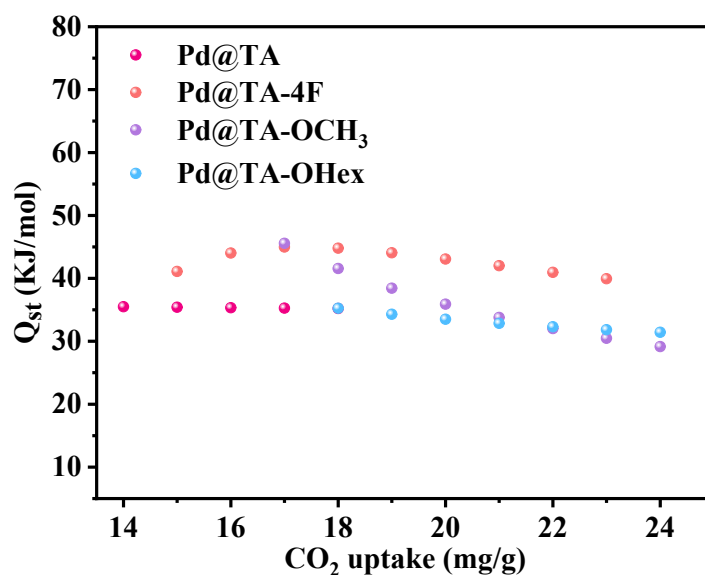

**Figure S44.** Enthalpy of adsorption of different COF Pd catalysts.

**Table S4.** Pd content in fresh Pd@TA-OCH<sub>3</sub> and reaction filtrate.

| Catalysts              | Pd content |
|------------------------|------------|
| Pd@TA-OCH <sub>3</sub> | 13.2%      |
| Reaction filtrate      | 0.0052%    |

**Table S5.** Comparison of reaction conditions in different reaction systems <sup>4-11</sup>.

| Entry | Catalytic system                       | Ligand             | Pd loading or Cat. | t (h) | T (°C) | CO <sub>2</sub> pressure | Base                            | Solvents    | Yield (%) | Source    |
|-------|----------------------------------------|--------------------|--------------------|-------|--------|--------------------------|---------------------------------|-------------|-----------|-----------|
| 1     | Pd@TA-OCH <sub>3</sub>                 | No                 | 5 mg, 2 mol%       | 12    | 80     | 1 atm                    | DBU                             | MeCN        | 98        | This work |
| 2     | Pd(OAc) <sub>2</sub>                   | BuPAd <sub>2</sub> | 10 mol%            | 7     | 80     | 10 bar                   | CS <sub>2</sub> CO <sub>3</sub> | 1,4-dioxane | 91        | Ref.(4)   |
| 3     | Pd(CH <sub>3</sub> CN) <sub>2</sub> Cl | Sphos              | 10 mol%            | 24    | 90     | 2 MPa                    | CS <sub>2</sub> CO <sub>3</sub> | DMSO        | 90        | Ref.(5)   |
| 4     | Pd(II)EN@GO                            | No                 | 50 mg              | 10    | 80     | 1 atm                    | DBU                             | MeCN        | 94        | Ref.(6)   |
| 5     | PdCl <sub>2</sub>                      | PPh <sub>3</sub>   | 10 mol%            | 12    | 80     | 1 atm                    | DBU                             | MeCN        | 97        | Ref.(7)   |
| 6     | Pd(0)@POL-TBZP                         | No                 | 0.02 mol%          | 12    | 90     | 1 atm                    | DBU                             | DMSO        | 95        | Ref.(8)   |
| 7     | Pd NCs@ZIF-8                           | No                 | 11.2 wt%           | 10    | 80     | 1 atm                    | DBU                             | MeCN        | 92        | Ref.(9)   |
| 8     | Pd@POP-1                               | No                 | 0.168 mol%         | 18    | 60     | 1 atm                    | DBU                             | MeCN        | 92        | Ref.(10)  |
| 9     | Pd/MIL-101-PPh <sub>3</sub>            | No                 | 0.15 mol%          | 3     | 80     | 1 atm                    | DBU                             | MeCN        | 92        | Ref.(11)  |

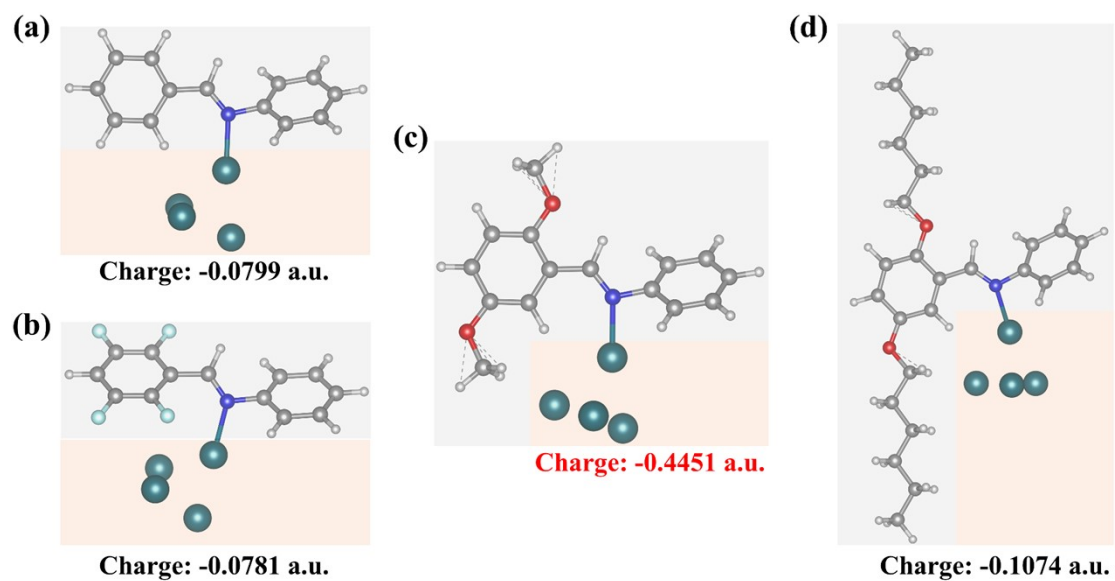

**Figure S45.** Calculated charge of the Pd cluster in (a) Pd@TA, (b) Pd@TA-4F, (c) Pd@TA-OCH<sub>3</sub>, (d) Pd@TA-OHex.

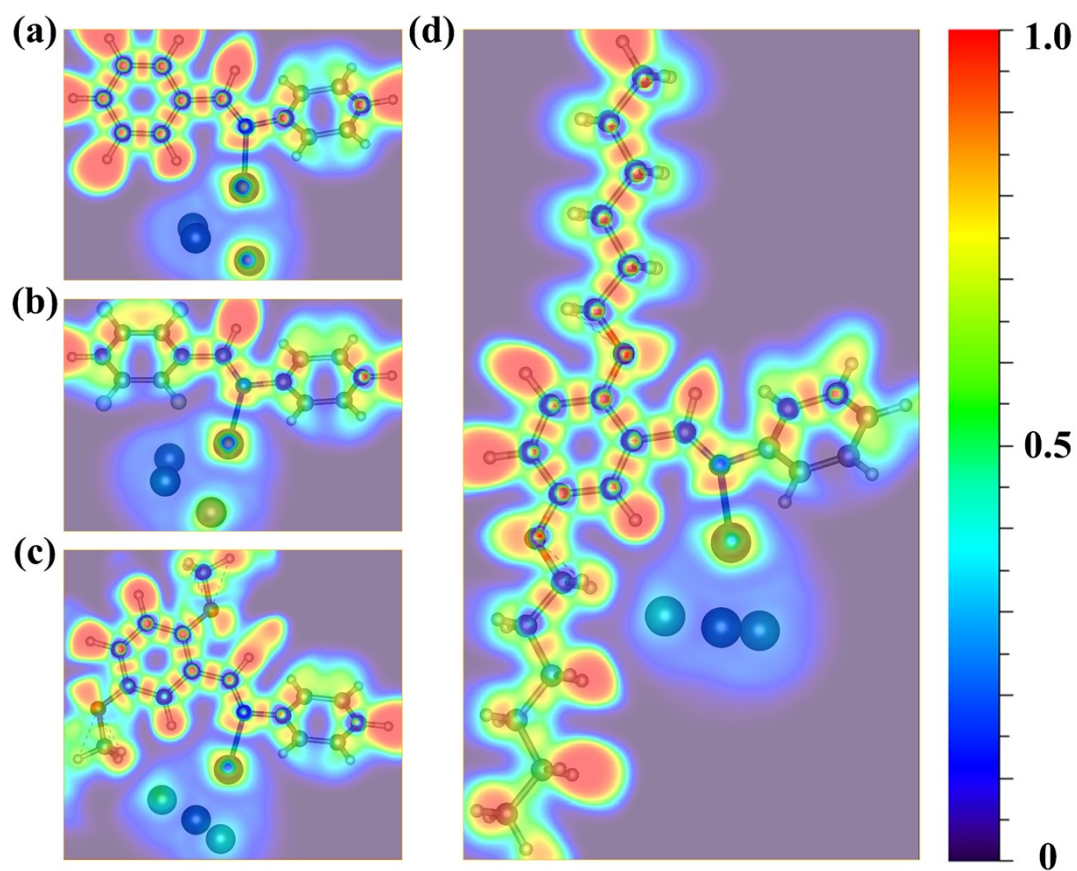

**Figure S46.** The calculated ELF diagrams of (a) Pd@TA, (b) Pd@TA-4F, (c) Pd@TA-OCH<sub>3</sub>, (d) Pd@TA-OHex.

### 3. NMR Analysis of Oxazolidinone Products

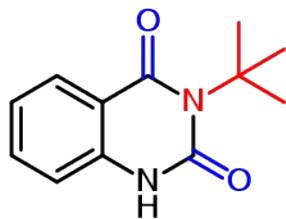

3-(tert-butyl)quinazoline-2,4(1H,3H)-dione (3a): yield: 98%. White solid.  $^1\text{H}$  NMR (400 MHz,  $\text{CDCl}_3$ ):  $\delta$  = 9.87 (s, 1H), 7.95-7.93 (d,  $J$  = 7.4 Hz, 1H), 7.49-7.46 (m, 1H), 7.19-7.08 (m, 1H), 6.93 (d,  $J$  = 8.1 Hz, 1H), 1.73 (s, 9H).  $^{13}\text{C}$  NMR (100 MHz,  $\text{CDCl}_3$ ):  $\delta$  = 163.3, 152.0, 137.0, 133.3, 127.1, 121.8, 116.0, 112.9, 61.0, 28.9.

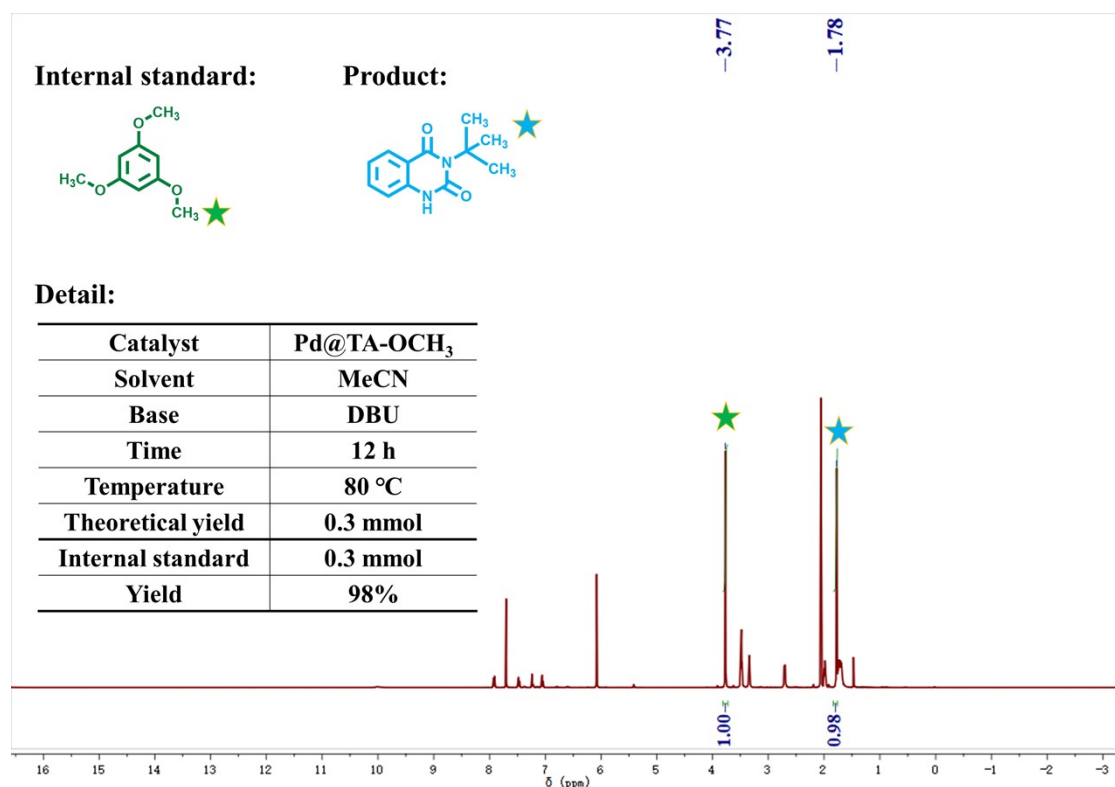

**Figure S47.**  $^1\text{H}$  NMR determination of yield.

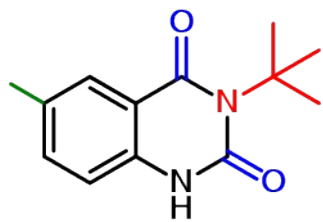

3-(tert-butyl)-6-methylquinazoline-2,4(1H,3H)-dione (3b): yield: 70%. Gray solid.  $^1\text{H}$  NMR (400 MHz,  $\text{CDCl}_3$ ):  $\delta$  = 9.38 (d,  $J$  = 51.8 Hz, 1H), 7.74-7.73 (s, 1H), 7.29-7.27 (dd,  $J$  = 8.2, 1.6 Hz, 1H), 6.81 (d,  $J$  = 8.2 Hz, 1H), 2.30 (s, 3H), 1.71 (s, 9H).  $^{13}\text{C}$  NMR (100 MHz,  $\text{CDCl}_3$ ):  $\delta$  = 163.4, 151.7, 134.7, 134.4, 131.5, 126.7, 115.8, 112.8, 60.9, 28.9, 19.8.

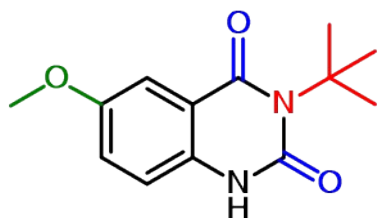

3-(tert-butyl)-6-methoxyquinazoline-2,4(1H,3H)-dione (3c): Brown solid, yield: 69%.  $^1\text{H}$  NMR (400 MHz,  $\text{CDCl}_3$ ):  $\delta$  = 10.62 (s, 1H), 7.37 (s, 1H), 7.19 (dd,  $J$  = 8.8, 2.8 Hz, 1H), 7.08 (d,  $J$  = 8.7 Hz, 1H), 3.75 (s, 3H), 1.73 (s, 9H).  $^{13}\text{C}$  NMR (100 MHz,  $\text{CDCl}_3$ ):  $\delta$  = 163.4, 154.4, 152.3, 131.4, 122.9, 116.4, 114.7, 107.6, 61.0, 54.7, 29.0.

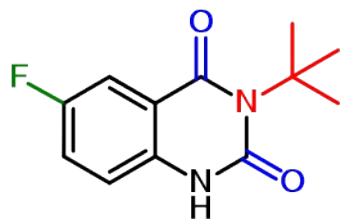

3-(tert-butyl)-6-fluoroquinazoline-2,4(1H,3H)-dione (3d): Brown solid, yield: 60%.  $^1\text{H}$  NMR (400 MHz,  $\text{CDCl}_3$ ):  $\delta$  = 10.46 (s, 1H), 7.63 (d,  $J$  = 8.2 Hz, 1H), 7.20 (td,  $J$  = 8.5, 2.3 Hz, 1H), 6.94 (dd,  $J$  = 8.7, 4.1 Hz, 1H), 1.72 (s, 9H).  $^{13}\text{C}$  NMR (100 MHz,  $\text{CDCl}_3$ ):  $\delta$  = 162.4 ( $J$  = 2.6 Hz), 158.5 ( $J$  = 241.4 Hz), 152.2, 133.5, 121.4 ( $J$  = 24.3 Hz), 117.0

(J = 8.1 Hz), 114.8 (J = 7.5 Hz), 112.7 (J = 25.7 Hz), 61.4, 28.9.

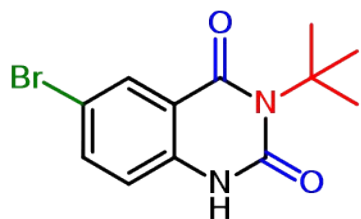

6-bromo-3-(tert-butyl)quinazoline-2,4(1H,3H)-dione (3e): Brown solid. Yield: 73%.

$^1\text{H}$  NMR (400 MHz,  $\text{CDCl}_3$ ):  $\delta$  = 10.02 (s, 1H), 8.07 (d, J = 2.2 Hz, 1H), 7.56 (dd, J = 8.5, 2.2 Hz, 1H), 6.83 (d, J = 8.5 Hz, 1H), 1.70 (s, 9H).  $^{13}\text{C}$  NMR (100 MHz,  $\text{CDCl}_3$ ):  $\delta$  = 162.0, 151.8, 136.2, 135.9, 129.7, 117.5, 114.8, 114.4, 61.5, 28.8.

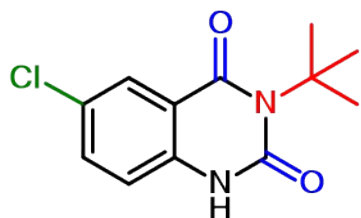

3-(tert-butyl)-6-chloroquinazoline-2,4(1H,3H)-dione (3f): Gray solid, yield: 53%.  $^1\text{H}$  NMR (400 MHz,  $\text{CDCl}_3$ ):  $\delta$  = 9.96 (s, 1H), 7.92 (d, J = 2.3 Hz, 1H), 7.41 (dd, J = 8.6, 2.4 Hz, 1H), 6.88 (d, J = 8.6 Hz, 1H), 1.71 (s, 9H).  $^{13}\text{C}$  NMR (100 MHz,  $\text{CDCl}_3$ ):  $\delta$  = 162.1, 151.8, 135.5, 133.5, 127.3, 126.7, 117.1, 114.5, 61.5, 28.8.

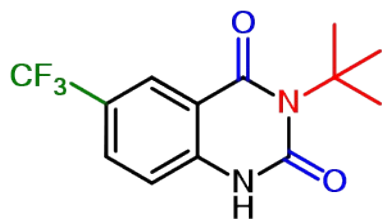

3-(tert-butyl)-6-(trifluoromethyl)quinazoline-2,4(1H,3H)-dione (3g): Brown solid, yield: 74%.  $^1\text{H}$  NMR (400 MHz,  $\text{CDCl}_3$ ):  $\delta$  = 10.51 (s, 1H), 8.25 (s, 1H), 7.71 (dd, J = 8.5, 1.5 Hz, 1H), 7.69 (d, J = 8.3 Hz, 1H), 1.73 (s, 9H).  $^{13}\text{C}$  NMR (100 MHz,  $\text{CDCl}_3$ ):  $\delta$  = 162.2, 152.1, 139.4, 130.0 (J = 3.4 Hz), 125.1, 124.4 (J = 33.5 Hz), 124.0 (J = 270.1

Hz), 115.8, 113.7, 61.8, 28.8.

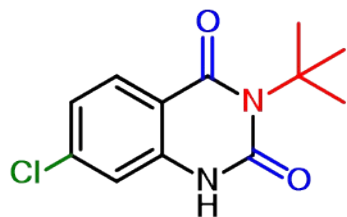

3-(tert-butyl)-7-chloroquinazoline-2,4(1H,3H)-dione (3h): Yellow solid, yield: 94%.

$^1\text{H}$  NMR (400 MHz,  $\text{CDCl}_3$ ):  $\delta$  = 9.78 (m, 1H), 7.88 (d,  $J$  = 8.5 Hz, 1H), 7.06 (dd,  $J$  = 8.5, 1.9 Hz, 1H), 6.92 (t,  $J$  = 1.5 Hz, 1H), 1.71 (s, 9H).  $^{13}\text{C}$  NMR (100 MHz,  $\text{CDCl}_3$ ):  $\delta$  = 162.5, 151.7, 139.5, 137.8, 128.7, 122.4, 114.4, 112.8, 61.4, 28.9.

# Compound 3a

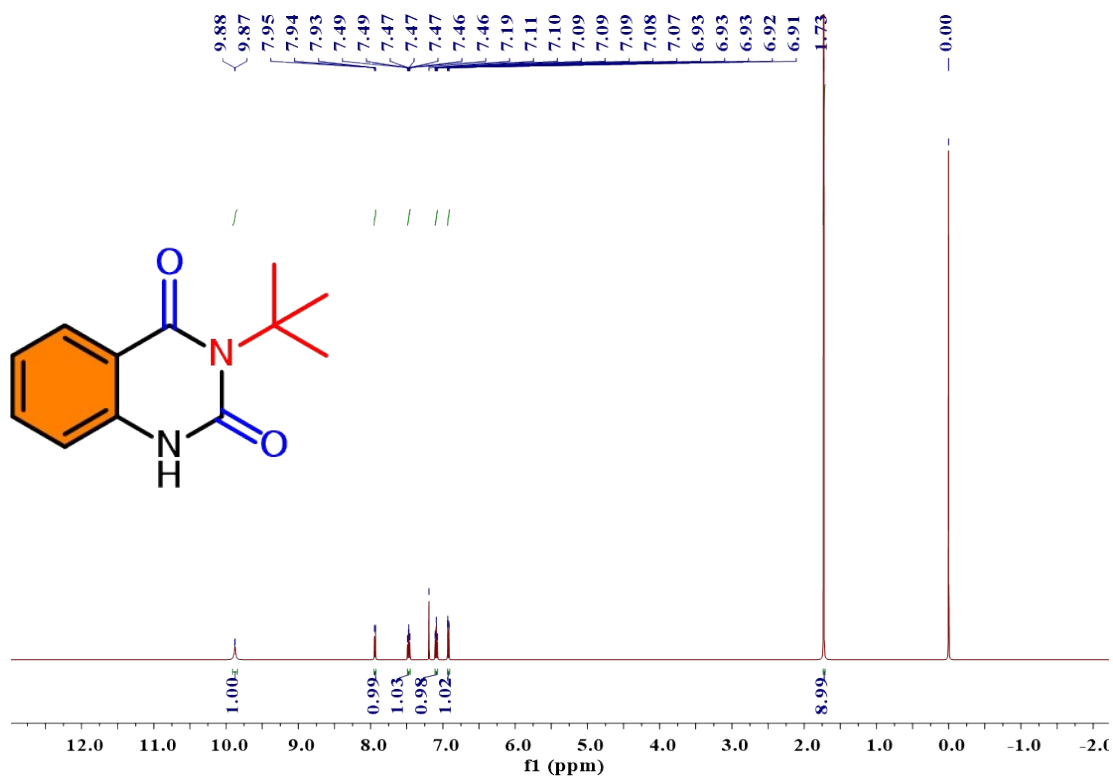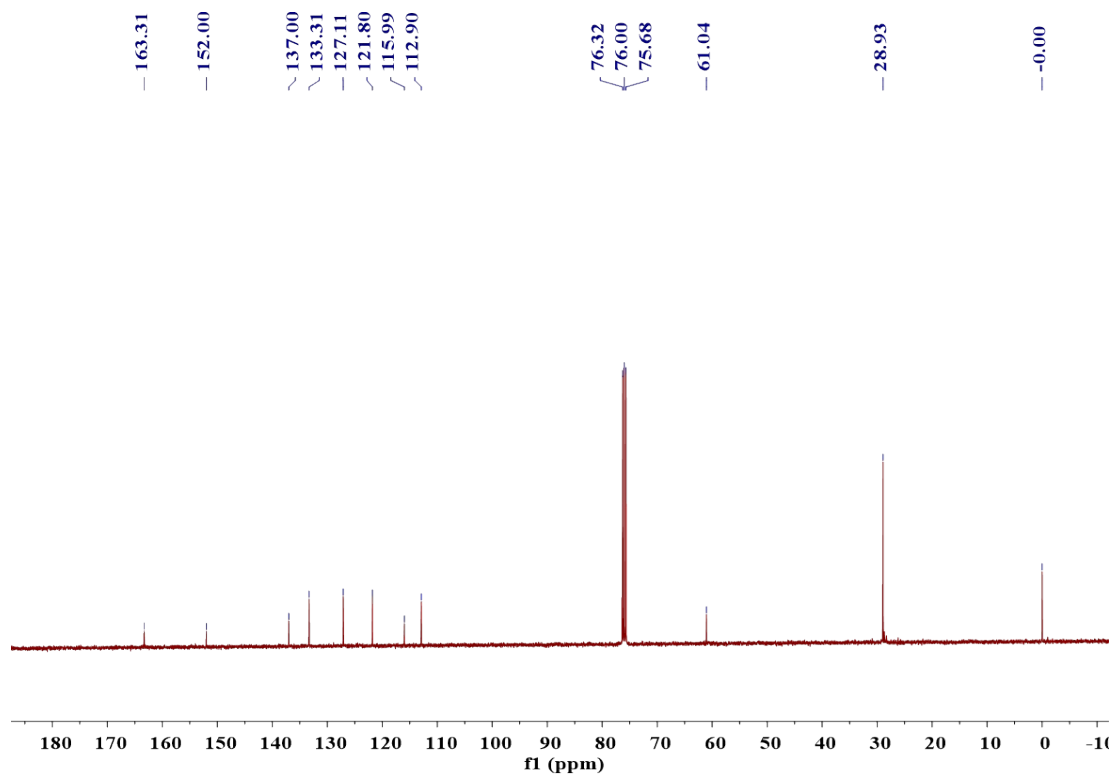

# Compound 3b

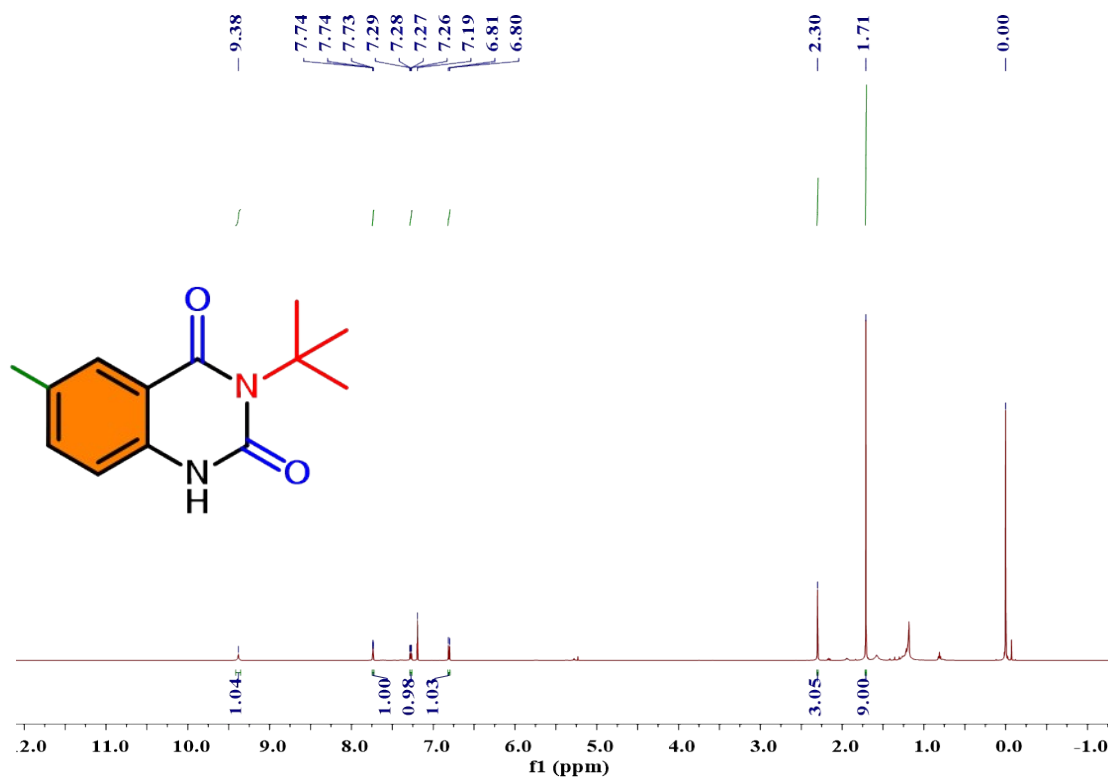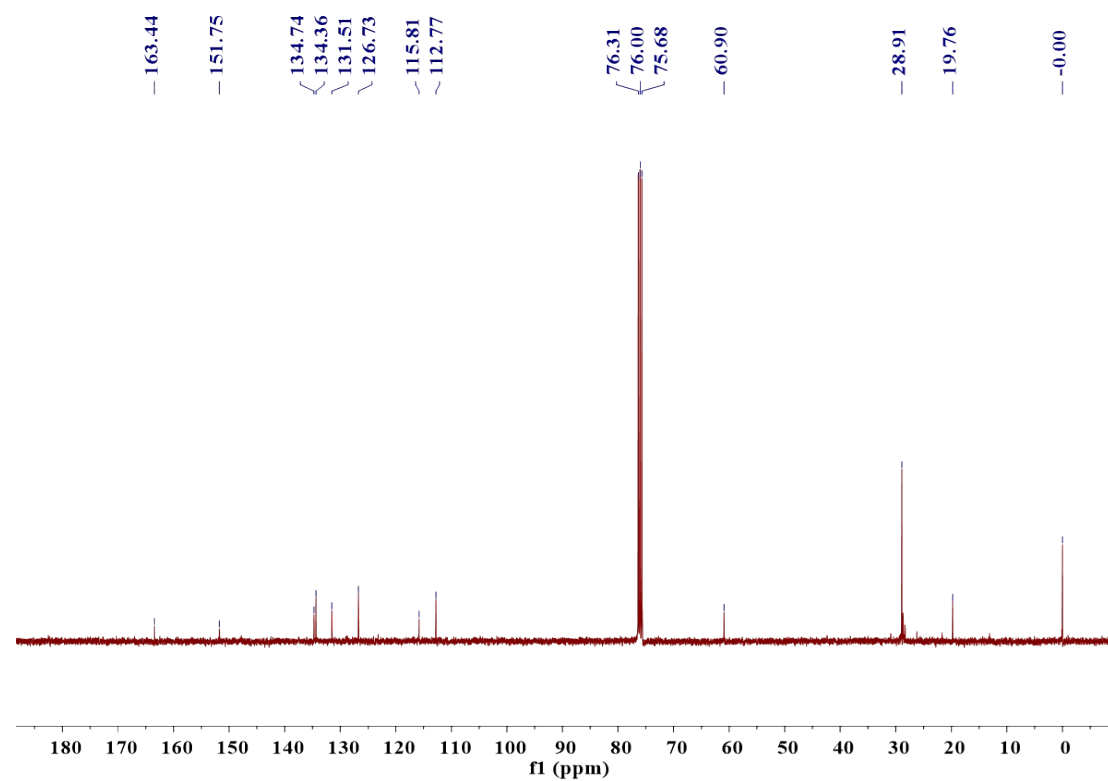

# Compound 3c

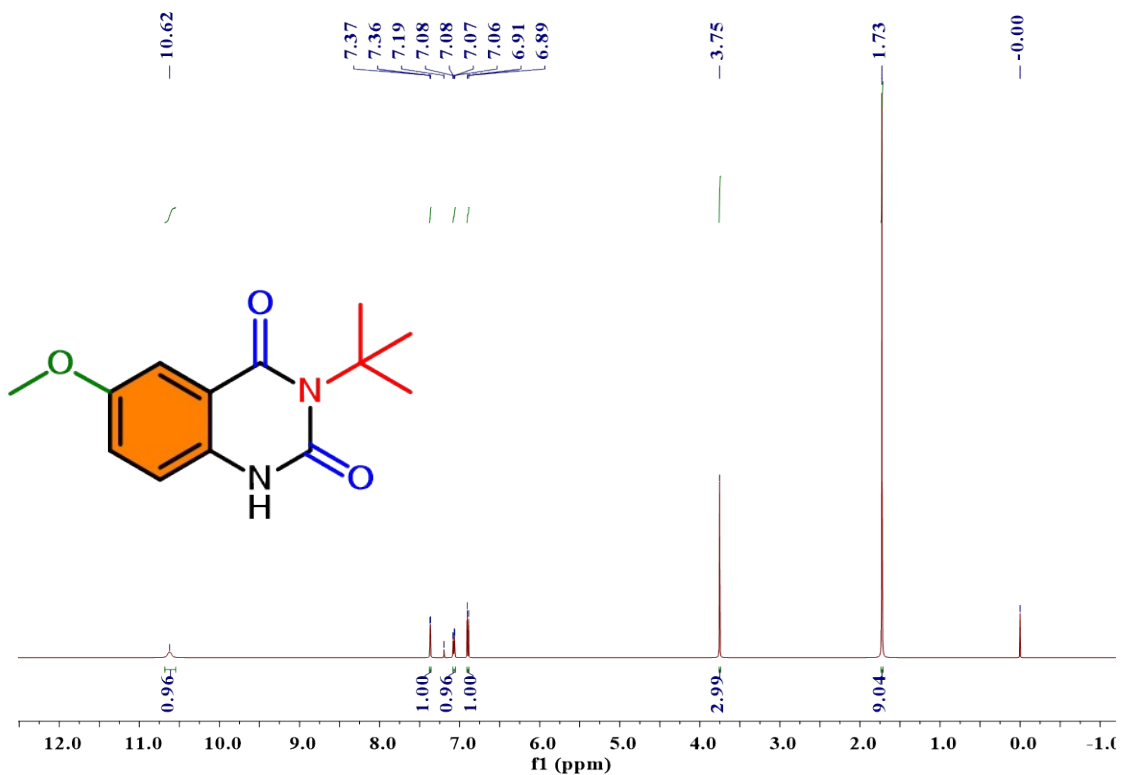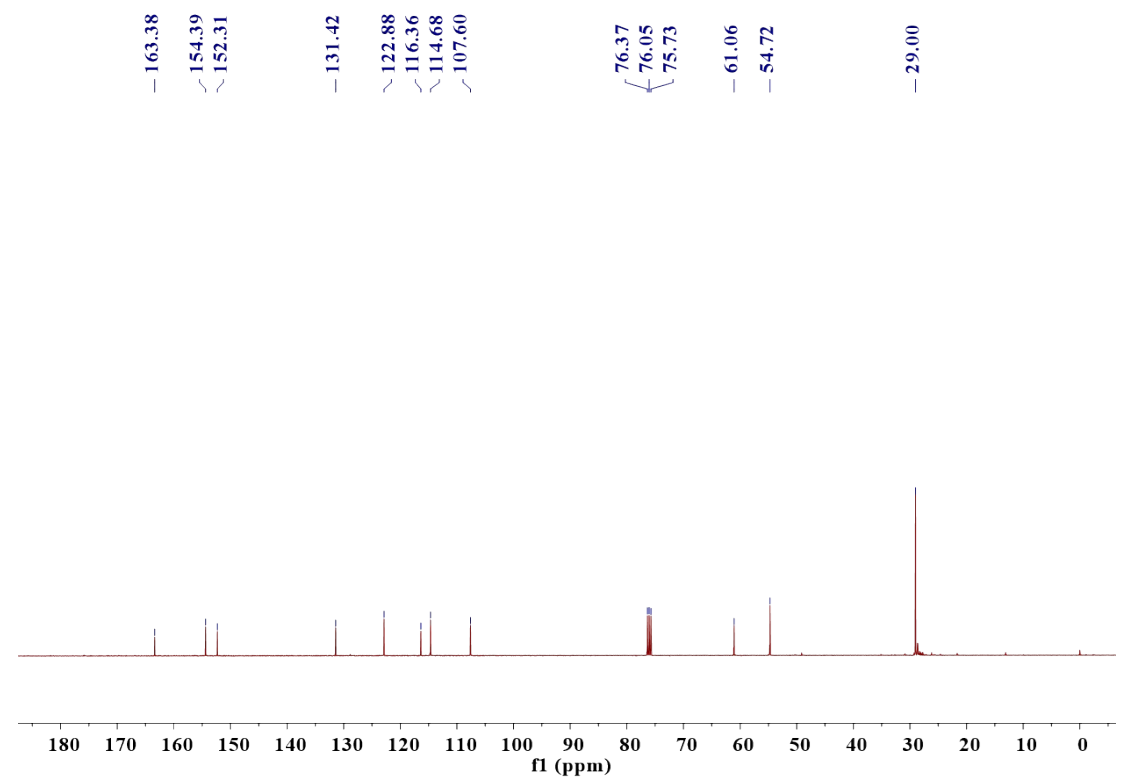

# Compound 3d

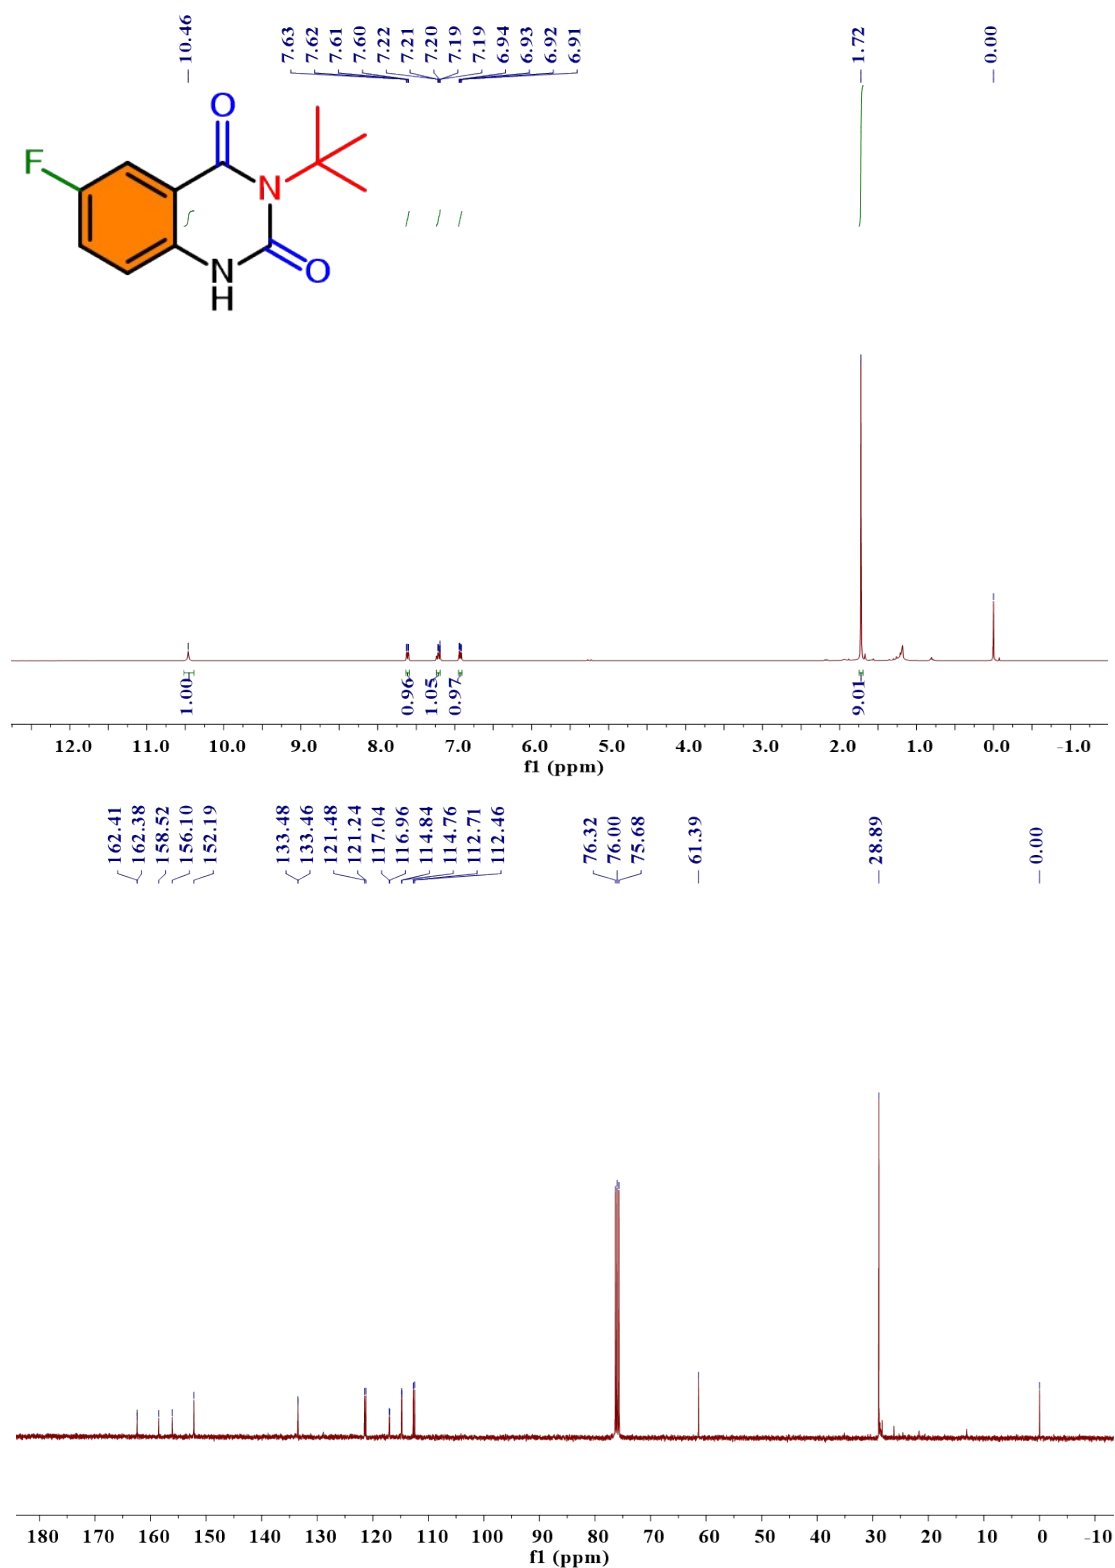

# Compound 3e

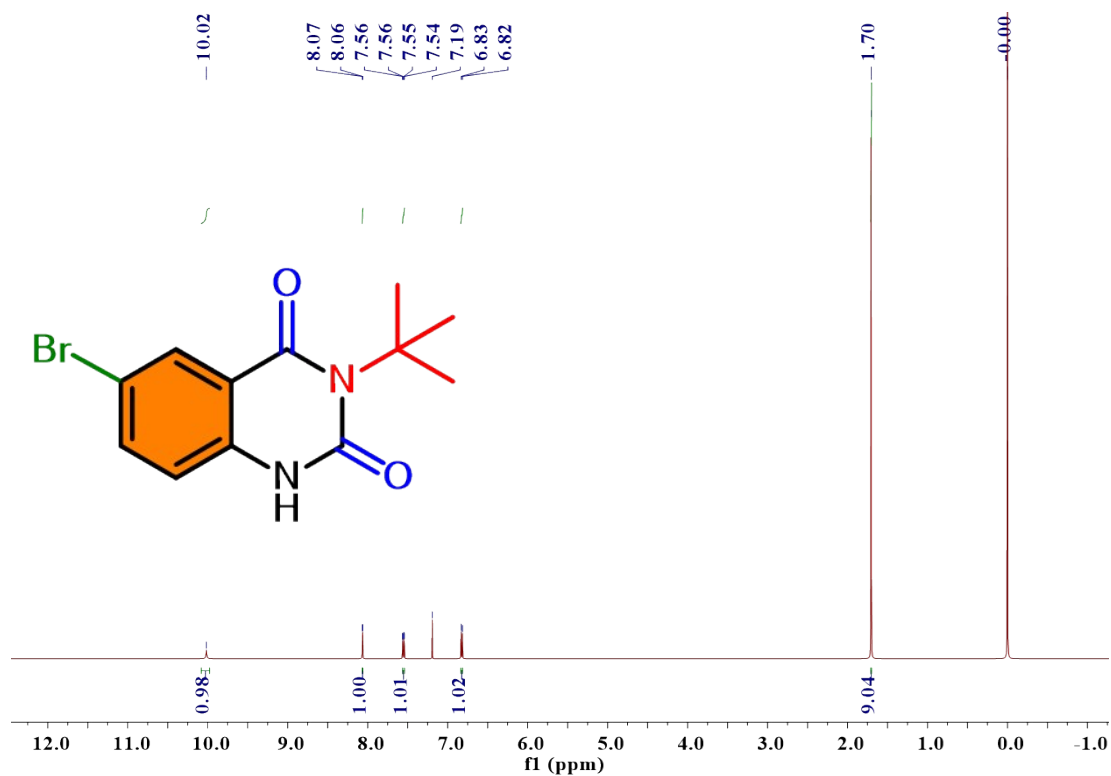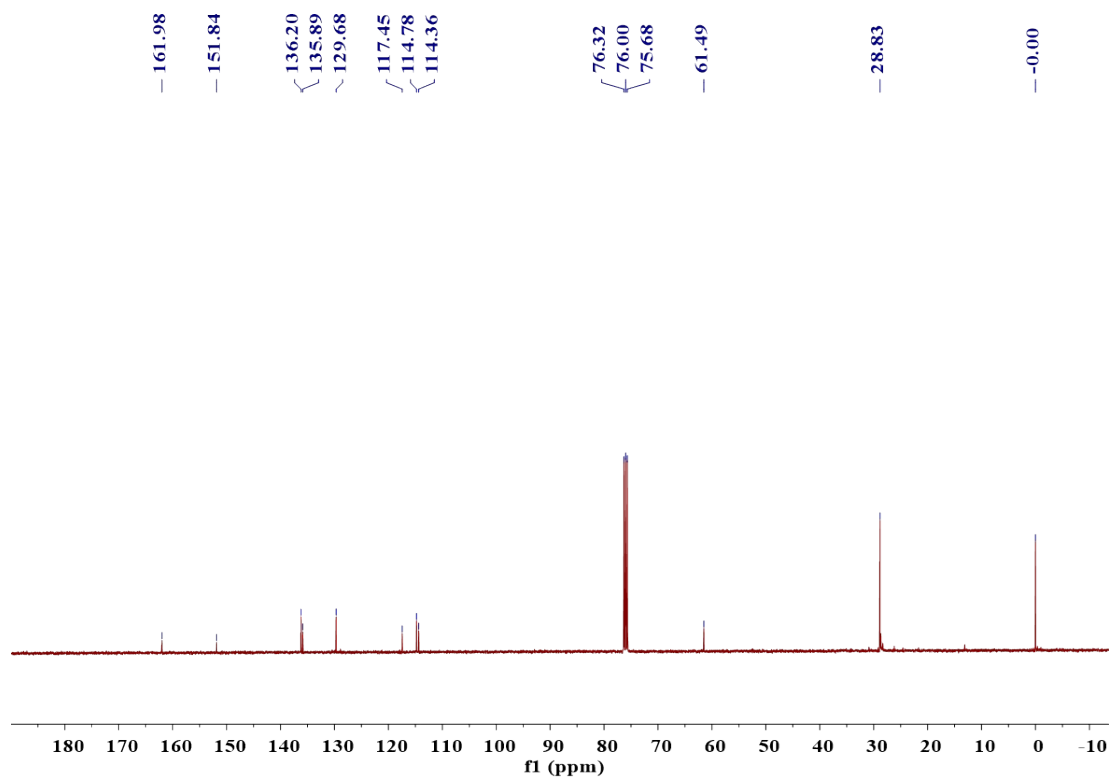

# Compound 3f

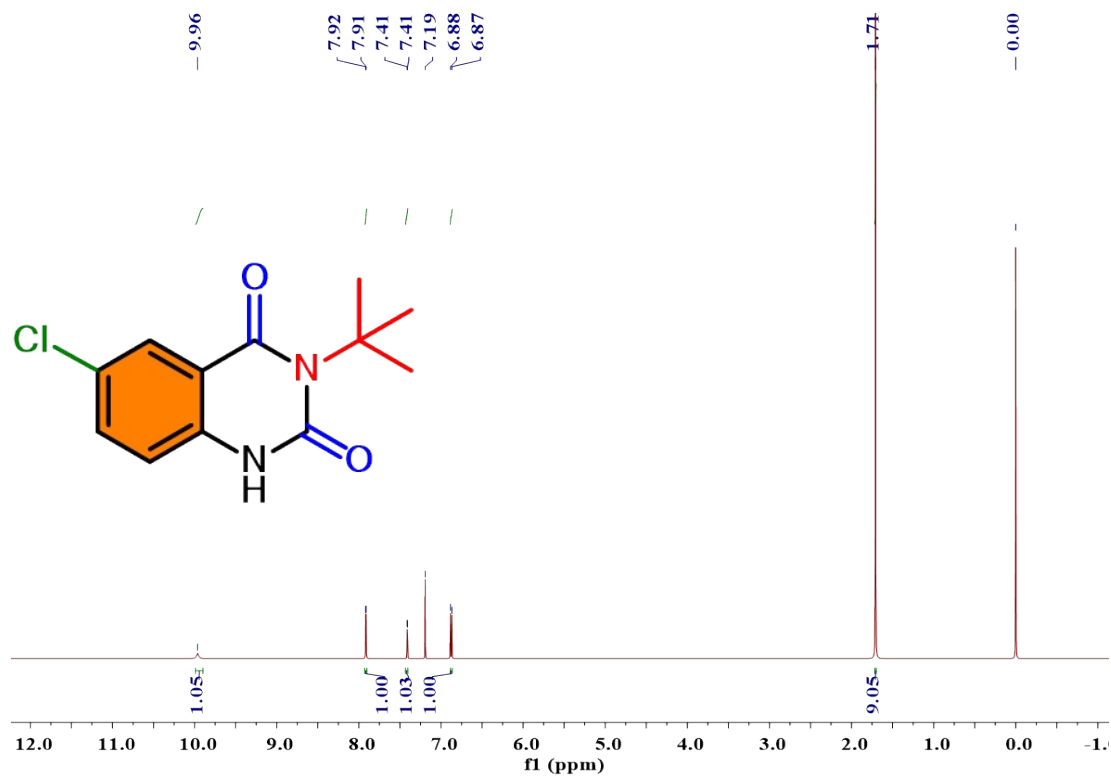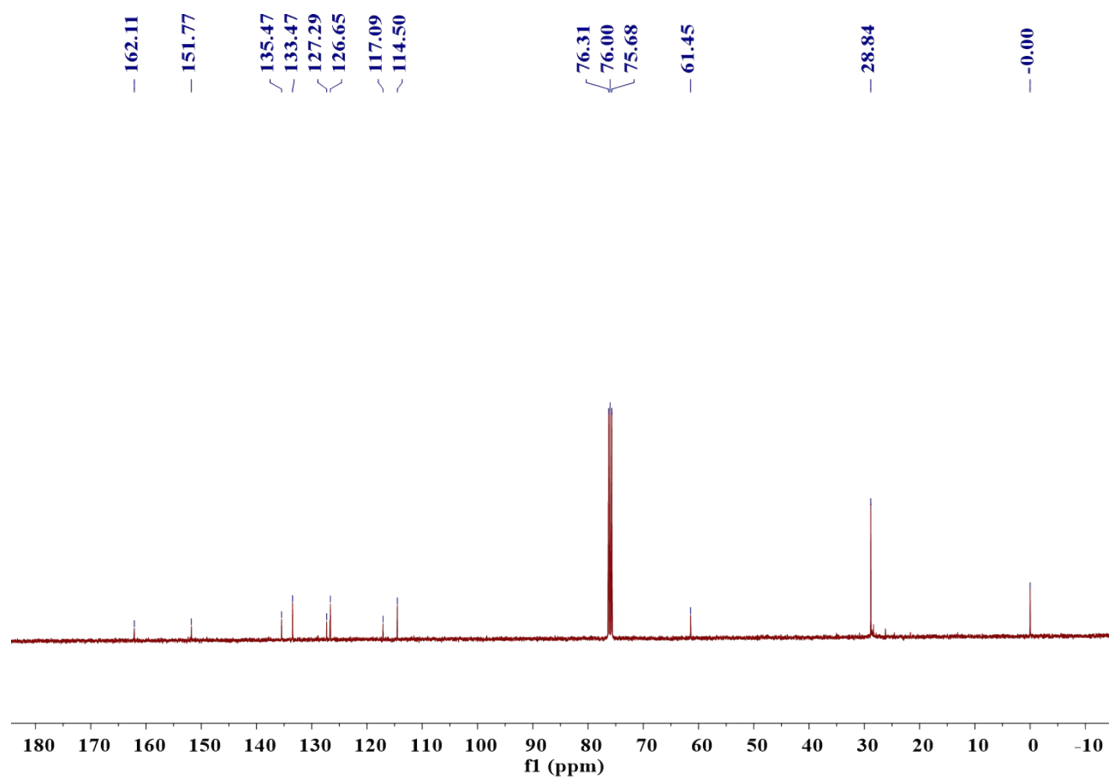

# Compound 3g

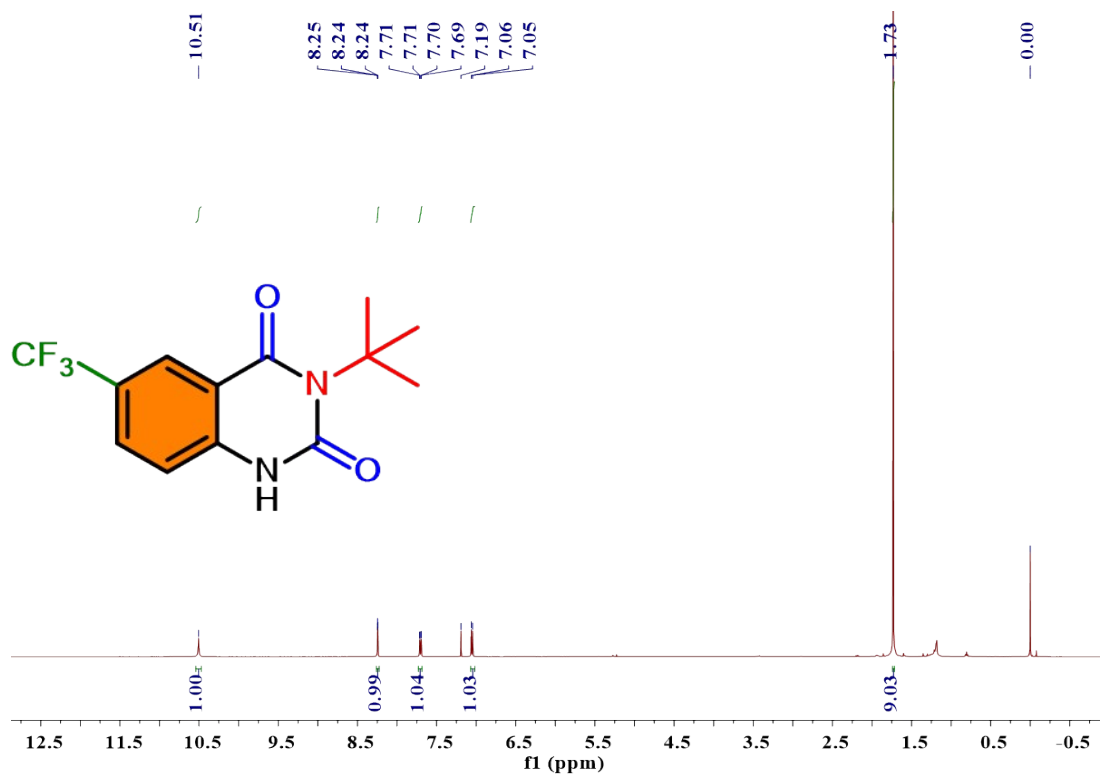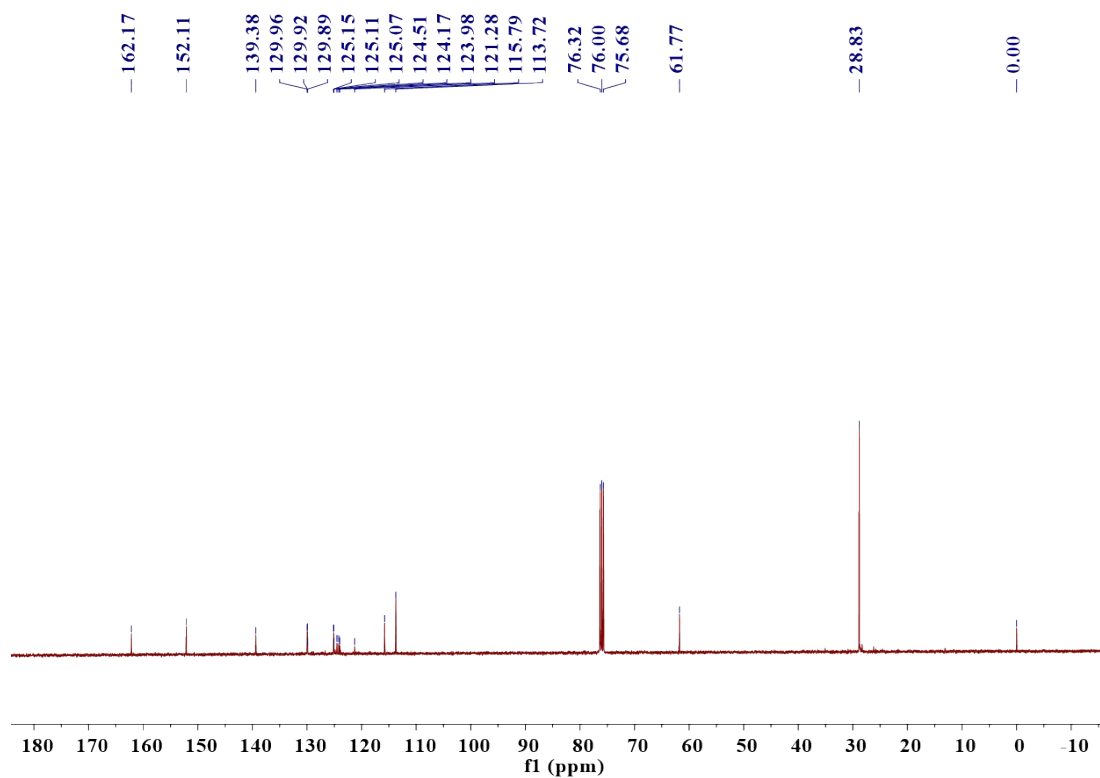

# Compound 3h

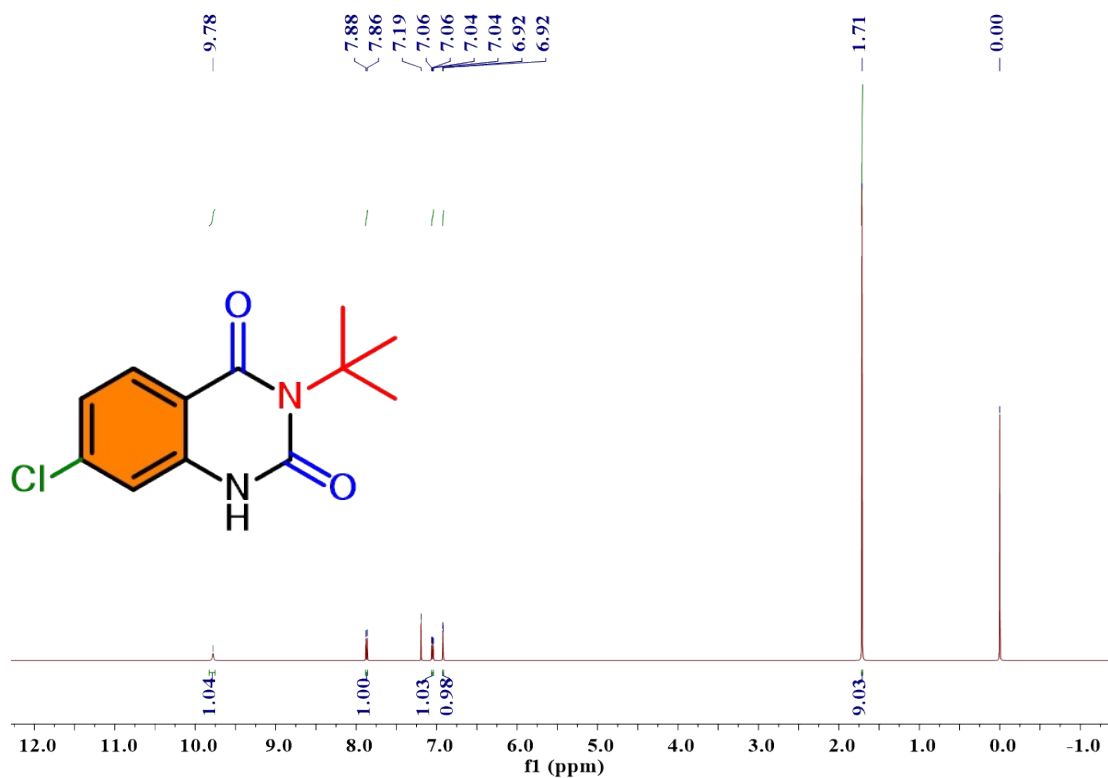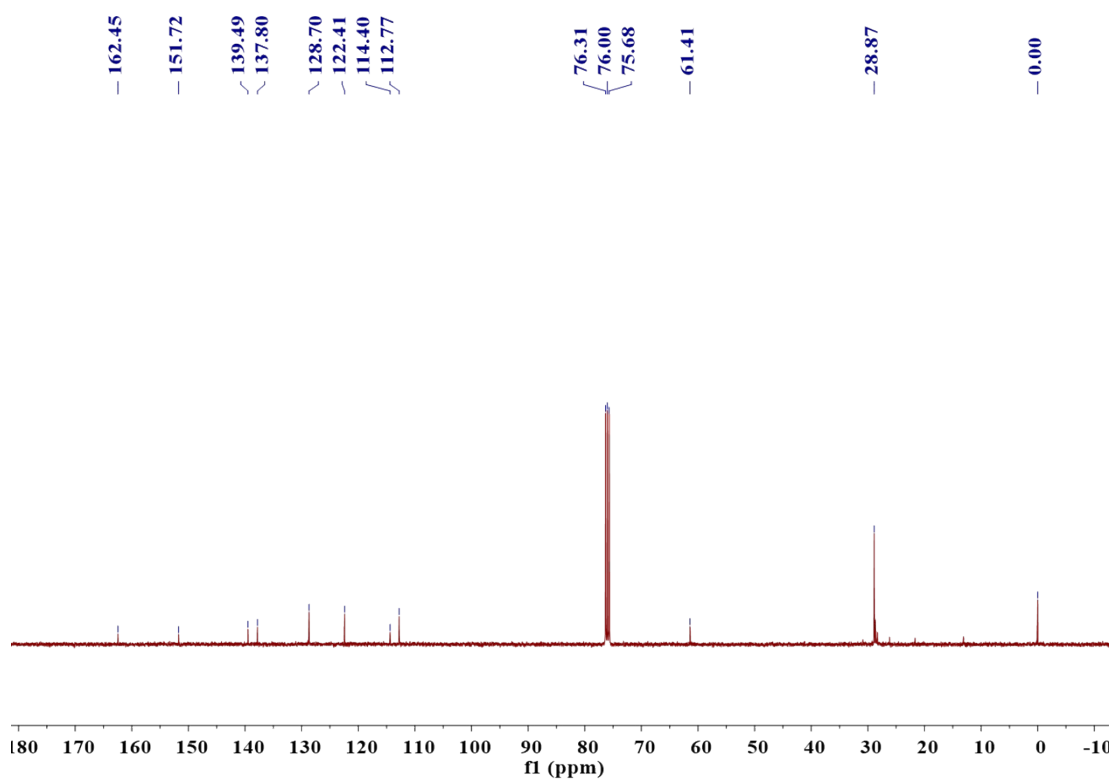

- 1 Y. Qian, Y. Han, X. Zhang, G. Yang, G. Zhang and H.-L. Jiang, Computation-based regulation of excitonic effects in donor-acceptor covalent organic frameworks for enhanced photocatalysis. *Nat. Commun.*, 2023, **14**, 3083.
- 2 D. Zhu, J.-J. Zhang, X. Wu, Q. Yan, F. Liu, Y. Zhu, X. Gao, M. M. Rahman, B. I. Yakobson, P. M. Ajayan and R. Verduzco, Understanding fragility and engineering activation stability in two-dimensional covalent organic frameworks. *Chem. Sci.*, 2022, **13**, 9655-9667.
- 3 N. Lopatik, A. De, S. Paasch, A. Schneemann and E. Brunner, High-field and fast-spinning <sup>1</sup>H MAS NMR spectroscopy for the characterization of two-dimensional covalent organic frameworks. *Phys. Chem. Chem. Phys.*, 2023, **25**, 30237-30245.
- 4 P. Mampuy, H. Neumann, S. Sergeyev, R. V. A. Orru, H. Jiao, A. Spannenberg, B. U. W. Maes and M. Beller, Combining Isocyanides with Carbon Dioxide in Palladium-Catalyzed Heterocycle Synthesis: N3-Substituted Quinazoline-2,4(1H,3H)-diones via a Three-Component Reaction. *ACS Catal.*, 2017, **7**, 5549-5556.
- 5 G. Wang, Y. Gan and Y. Liu, Nickel-Catalyzed Direct Coupling of Allylic Alcohols with Organoboron Reagents. *Chinese J. Chem.*, 2018, **36**, 916-920.
- 6 B. Guo, H.-Y. Li, J.-Y. Chen, D. J. Young, J.-P. Lang and H.-X. Li, Conjugated nanoporous polycarbazole bearing a cobalt complex for efficient visible-light driven hydrogen evolution. *New J. Chem.*, 2020, **44**, 8736-8742.
- 7 P. Xu, F. Wang, T.-Q. Wei, L. Yin, S.-Y. Wang and S.-J. Ji, Palladium-Catalyzed Incorporation of Two C1 Building Blocks: The Reaction of Atmospheric CO<sub>2</sub> and Isocyanides with 2-Iodoanilines Leading to the Synthesis of Quinazoline-2,4(1H,3H)-diones. *Org. Lett.*, 2017, **19**, 4484-4487.
- 8 S. Ren, S. Lin, Z. Ren, M. Wang, Y. Yang, H.-T. Tang, P. Chen, L. Zhou and Y.-M. Pan, Single-Site Palladium “Microreactor” for Carbon Dioxide Coupling/Cyclization Reactions. *ACS Sustainable Chem. Eng.*, 2025, **13**, 2001-2010.
- 9 H. Pan, Z. Li, Q. Ma, Y. Zhang, Y. Zheng and Y. Gao, Cobalt catalyst encapsulated by N-doped carbon for selective hydrogenation of aldehyde to alcohol. *Mol. Catal.*, 2024, **553**, 113752.
- 10 Y. Liang, K.-Z. Xu, P.-B. Chen, P. Fang, J. Huang and Y.-M. Pan, Sustainable Synthesis of Quinazolinones Through Boiler Flue Gas CO<sub>2</sub> Utilization Via Pd@POP-1 Catalyst Under Mild Conditions. *Adv. Synth. Catal.*, 2025, **367**, e202500238.
- 11 Y. Wu, X. Feng, Q. Zhai, H. Wang, H. Jiang and Y. Ren, Metal–Organic Framework Surface Functionalization Enhancing the Activity and Stability of Palladium Nanoparticles for Carbon–Halogen Bond Activation. *Inorg. Chem.*, 2022, **61**, 6995-7004.
